# Supplementary material for: Common and Distinct Impacts of Autistic Traits and Alexithymia on Social Reward
Source: PLoS One. 2015 Apr 8;10(4):e0121018. doi: 10.1371/journal.pone.0121018 (PMC4390314; doi:10.1371/journal.pone.0121018)
Supplement: S1 Dataset — (XLS) [file pone.0121018.s001.xls]

## Sheet: datafile_plosone
id	Gender	Age	Ethnicity	Education	AQ1	AQ2	AQ3	AQ4	AQ5	AQ6	AQ7	AQ8	AQ9	AQ10	AQ11	AQ12	AQ13	AQ14	AQ15	AQ16	AQ17	AQ18	AQ19	AQ20	AQ21	AQ22	AQ23	AQ24	AQ25	AQ26	AQ27	AQ28	AQ29	AQ30	AQ31	AQ32	AQ33	AQ34	AQ35	AQ36	AQ37	AQ38	AQ39	AQ40	AQ41	AQ42	AQ43	AQ44	AQ45
1421	1	46	11	3	1	3	2	3	4	3	4	2	1	1	1	4	4	2	1	3	1	1	1	3	1	4	3	2	2	4	1	2	4	3	1	2	4	2	1	1	2	1	1	4	1	4	3	1	4
1422	0	27	11	3	2	3	3	3	2	2	3	3	2	3	3	2	2	3	2	2	2	2	2	3	2	3	3	2	3	2	2	3	3	2	2	2	2	3	2	2	3	2	3	2	3	3	2	3	2
1423	1	49	11	3	3	3	3	3	4	3	2	4	3	3	3	3	2	3	3	3	3	2	2	2	4	2	3	1	2	3	3	3	4	1	4	3	1	2	1	3	3	2	3	4	3	1	3	3	2
1424	1	54	11	3	1	2	4	4	4	2	3	4	2	3	1	3	4	4	2	4	1	1	1	1	1	3	4	2	3	4	3	2	4	3	4	2	1	3	1	3	4	1	2	1	3	1	4	1	2
1426	0	26	11	1	1	4	4	3	2	1	3	4	2	1	2	2	2	3	2	4	3	2	2	2	2	3	3	2	2	3	2	2	4	2	3	1	2	2	1	2	2	2	2	3	3	4	2	3	3
1429	0	25	6	2	1	3	2	2	3	2	3	2	2	2	2	3	2	3	4	1	3	2	2	2	3	2	3	4	2	3	4	3	2	2	3	3	2	2	3	2	2	4	3	2	3	3	1	4	3
1430	0	57	11	3	1	1	3	2	3	3	3	3	2	3	2	3	4	3	2	2	1	2	2	2	1	3	3	2	4	3	3	2	3	3	3	4	3	4	1	3	3	1	2	2	2	2	1	1	2
1434	0	34	11	2	3	2	4	2	3	3	4	4	2	4	4	4	2	1	2	3	4	3	2	1	1	2	3	2	1	2	3	3	2	2	3	3	3	3	2	3	3	4	3	2	2	2	2	2	1
1435	1	35	11	3	3	3	2	1	4	2	2	2	1	3	2	4	3	3	3	2	2	2	1	2	2	3	3	1	3	2	4	2	3	2	4	3	1	2	2	3	4	3	1	3	1	2	3	2	2
1436	0	49	11	3	1	3	4	4	4	4	3	4	2	2	1	4	2	1	2	4	1	2	3	1	1	4	4	3	2	4	2	3	2	1	2	2	3	3	2	2	3	1	1	3	2	2	3	2	4
1437	1	33	11	3	2	3	3	3	3	3	2	2	2	2	1	3	3	3	3	3	1	1	2	1	1	3	3	2	1	2	3	2	1	1	4	1	1	3	1	4	2	1	1	3	1	3	3	3	1
1438	0	27	11	3	2	2	3	2	2	2	1	1	3	4	4	4	3	3	3	3	3	3	3	1	1	1	3	2	2	1	3	3	3	3	3	3	1	3	2	3	3	3	2	4	2	1	3	3	2
1439	1	34	11	3	2	3	3	2	3	1	1	3	2	3	2	3	2	2	2	2	2	1	1	1	2	3	2	2	2	3	2	2	3	2	3	2	2	3	2	3	3	2	2	3	2	2	3	3	2
1440	1	61	11	3	1	2	4	3	4	2	2	4	4	3	2	3	4	3	2	4	2	1	3	1	2	3	3	2	1	1	4	4	2	2	4	4	1	2	2	4	4	3	1	4	3	2	3	1	1
1441	1	24	11	2	2	3	3	3	3	3	2	3	2	2	3	3	4	3	2	3	2	2	2	2	1	2	3	2	2	2	3	2	2	2	3	3	2	3	1	3	3	2	2	3	3	2	3	3	2
1442	1	25	11	3	2	4	4	3	1	1	3	4	1	4	2	3	3	2	1	4	2	1	1	1	1	3	3	3	1	4	4	4	3	3	2	2	2	1	1	1	1	1	4	3	3	3	4	2	2
1443	0	24	11	2	2	3	3	2	3	3	2	2	1	2	2	3	2	2	2	4	3	2	1	2	2	3	2	2	1	3	3	3	3	3	3	3	3	2	1	3	3	2	3	3	2	2	3	3	2
1446	0	23	11	3	2	2	3	3	2	3	2	3	2	1	2	3	3	1	3	2	2	2	4	2	1	3	3	3	3	3	4	3	2	2	4	3	2	2	2	3	4	2	2	3	2	2	3	3	2
1447	0	19	11	1	2	4	3	3	3	4	4	4	3	3	1	4	4	2	2	4	2	2	4	2	4	4	4	2	2	4	4	4	1	2	4	2	3	2	4	3	4	1	1	3	4	4	4	2	3
1449	0	22	11	2	2	3	3	3	4	3	2	3	3	3	3	4	4	3	2	3	3	2	3	1	2	2	3	1	2	3	3	3	1	2	4	2	3	3	2	3	4	3	3	3	4	2	3	3	2
1450	0	29	11	1	1	3	4	1	4	3	4	4	1	4	2	3	1	1	1	1	1	1	1	1	1	4	3	4	3	3	1	4	3	2	3	3	4	3	2	1	1	2	3	1	1	1	1	3	1
1451	1	23	11	3	3	4	4	3	4	4	2	3	4	4	3	4	2	3	4	4	3	3	4	1	1	2	4	2	1	2	3	4	1	1	3	4	2	3	1	3	2	3	1	4	3	1	4	4	3
1452	0	26	7	1	4	1	3	4	4	3	1	4	1	1	2	4	4	4	2	4	2	1	1	2	1	2	3	2	2	3	3	4	2	2	4	3	1	4	3	3	3	2	1	3	1	1	3	3	1
1453	0	21	11	2	3	2	3	2	3	3	1	3	3	3	3	2	1	2	3	3	3	1	4	2	2	1	4	3	2	2	3	4	2	2	3	3	1	3	1	3	3	3	2	3	3	2	3	4	2
1454	0	44	11	3	2	3	4	3	4	2	1	4	2	4	4	4	2	4	3	3	4	1	2	2	1	1	3	2	3	2	3	4	2	2	3	3	2	4	2	3	3	4	3	4	3	2	4	3	2
1455	0	30	5	3	2	2	3	1	3	3	1	3	3	3	2	3	2	1	2	3	2	2	3	2	3	2	3	3	2	3	3	2	1	3	3	3	3	2	1	3	3	2	2	3	2	3	3	3	2
1456	1	58	11	1	3	1	4	1	1	1	1	4	1	3	4	2	2	4	4	1	4	1	2	1	1	1	3	2	4	1	3	2	4	1	4	3	1	2	1	4	3	4	1	4	1	1	4	4	1
1457	1	46	11	2	2	2	4	2	2	2	2	4	1	3	1	2	4	4	2	2	1	2	3	1	1	2	2	2	3	2	2	2	2	2	4	3	2	2	2	3	3	2	2	4	1	2	3	2	2
1458	1	34	11	3	2	2	3	2	3	4	1	2	3	2	1	2	3	3	2	1	1	2	3	2	1	4	3	1	1	4	2	2	1	2	3	3	2	2	2	3	3	1	1	4	4	3	3	1	3
1459	1	50	3	4	2	3	2	3	2	3	1	3	3	2	1	2	4	2	2	2	1	1	3	2	1	3	2	2	1	2	3	3	1	2	3	2	1	2	2	2	3	1	2	3	2	2	2	1	3
1460	1	44	11	3	2	3	2	1	4	1	1	3	3	4	3	3	1	2	4	4	2	1	3	2	4	1	3	4	2	2	3	3	2	2	4	3	1	2	1	3	4	3	1	4	2	1	4	2	1
1461	1	30	11	4	1	3	4	2	4	2	1	4	1	3	2	3	3	2	2	2	2	2	1	1	1	3	2	3	2	2	3	3	3	1	4	3	1	2	1	4	3	2	1	4	1	2	3	3	1
1462	1	58	11	4	3	1	4	3	2	2	1	4	1	2	4	3	2	4	3	4	4	1	1	1	3	1	2	4	3	1	4	3	3	3	4	3	1	3	2	3	4	4	1	3	1	1	2	4	1
1463	1	49	11	3	4	3	4	3	4	2	1	4	1	2	1	3	4	2	3	4	2	1	1	4	1	1	3	3	4	4	4	3	4	2	3	4	3	4	2	4	4	1	1	4	2	2	2	3	2
1464	0	23	11	3	3	4	3	2	3	4	3	4	3	4	3	1	2	4	3	1	3	4	3	1	1	4	2	4	1	3	4	1	3	4	2	4	2	1	2	4	2	3	1	3	4	2	1	3	4
1466	0	40	11	3	2	2	3	2	3	3	3	3	3	2	1	3	3	3	2	3	1	2	4	2	3	3	3	2	2	3	3	2	3	2	3	2	2	2	2	3	3	1	2	3	3	2	3	2	2
1467	0	31	6	2	1	1	4	1	3	3	1	1	3	3	2	3	3	1	2	3	2	2	3	2	2	1	3	3	1	1	4	2	3	3	3	4	1	2	3	3	3	2	2	3	4	4	3	2	2
1468	1	25	11	1	2	4	2	3	2	1	1	3	1	1	3	2	2	1	2	2	3	3	1	2	1	3	2	4	2	1	3	2	3	1	4	1	1	2	2	4	2	3	2	4	1	1	4	3	1
1469	0	30	16	1	1	4	2	4	4	1	2	3	1	1	1	2	4	3	2	3	1	2	1	1	1	4	1	4	2	4	2	1	4	3	1	2	3	2	2	3	2	1	2	3	1	2	3	1	2
1470	0	21	5	2	2	2	3	4	3	2	3	3	4	3	4	2	2	1	3	2	1	2	2	1	1	3	4	2	3	2	4	2	2	3	1	2	2	3	4	3	2	3	1	2	3	3	4	4	3
1472	1	26	11	1	3	4	3	3	4	1	2	4	1	2	1	3	4	2	2	3	1	1	1	1	1	4	2	1	2	3	2	2	3	2	2	3	3	2	2	1	3	1	2	4	4	2	3	1	3
1473	1	40	11	2	3	4	2	4	2	3	1	3	1	2	3	4	2	2	3	3	4	2	2	2	2	1	2	2	2	1	3	3	3	3	3	1	2	3	2	3	2	4	4	4	2	2	3	4	2
1474	1	45	11	2	3	2	3	3	2	2	1	4	2	3	2	3	4	4	4	2	2	2	2	2	1	3	3	2	3	2	2	3	2	2	3	4	2	3	2	3	3	3	2	3	2	2	3	2	2
1475	0	28	11	4	2	2	3	2	2	3	2	2	2	2	3	2	2	2	2	3	2	2	2	3	2	2	2	3	3	2	2	2	3	2	2	2	2	2	3	2	3	2	2	3	2	2	3	2	2
1476	0	32	7	1	2	2	2	3	2	1	1	1	2	1	2	2	1	1	2	2	2	1	2	1	1	3	3	3	3	3	3	2	2	2	2	4	1	1	1	1	2	2	1	2	3	3	3	2	2
1478	1	37	11	1	3	3	4	2	4	3	1	4	1	4	1	3	4	1	4	2	1	1	1	1	1	1	4	2	3	3	3	3	3	1	4	4	1	1	2	3	3	2	1	4	1	3	4	2	2
1479	1	59	5	4	4	2	4	2	1	3	1	4	2	4	4	3	2	1	4	2	3	1	2	1	2	1	2	4	3	1	4	3	3	1	4	3	1	3	4	4	4	4	1	4	2	2	4	4	1
1481	1	32	7	3	2	1	4	3	4	4	2	4	3	4	3	4	2	3	2	4	3	1	3	2	1	1	3	2	2	1	2	1	2	1	4	3	1	3	1	4	3	3	1	3	2	1	4	3	2
1482	1	58	15	4	1	3	4	3	4	2	2	4	1	4	2	4	4	3	2	2	2	3	1	1	1	3	4	3	2	2	4	3	4	1	4	3	3	3	3	1	2	2	2	2	1	2	3	2	3
1483	1	57	6	1	1	1	1	1	1	4	4	4	1	4	3	4	1	1	1	1	1	1	1	1	1	1	1	1	1	1	4	4	1	1	4	4	1	1	1	1	4	1	1	4	1	1	4	4	4
1484	1	26	7	1	2	2	3	3	4	3	3	4	3	3	4	3	4	4	3	3	4	3	4	4	3	3	3	3	1	4	3	4	3	4	3	4	4	3	2	3	3	4	3	2	3	2	3	3	3
1485	0	27	6	1	3	2	4	4	3	1	2	4	3	2	3	3	4	1	4	2	2	3	4	4	2	4	3	4	3	2	3	4	4	1	2	3	4	4	2	1	3	3	2	4	1	3	4	4	2
1486	1	52	11	3	2	2	4	3	3	4	1	4	3	1	2	3	4	3	2	1	2	1	3	1	1	3	4	4	2	2	4	3	1	2	4	2	1	3	1	4	1	2	1	4	1	2	3	2	1
1489	0	28	14	1	3	3	3	2	3	3	3	2	3	3	3	3	2	2	2	3	3	3	3	3	4	3	3	3	3	3	4	3	3	3	2	3	3	2	2	3	3	3	2	3	3	3	2	3	2
1493	1	24	15	3	1	4	3	3	3	2	2	3	1	1	1	2	4	1	2	3	1	2	3	3	1	3	3	2	1	4	1	2	3	4	2	2	3	1	2	2	3	1	2	3	3	3	3	1	4
1494	1	31	11	1	3	2	2	4	1	1	2	2	1	2	1	2	4	2	2	4	1	2	1	1	1	4	4	2	3	4	4	3	4	3	4	4	3	3	2	3	2	1	2	2	3	1	1	2	2
1496	1	18	11	1	3	3	3	3	2	3	2	3	3	2	3	3	3	2	2	2	3	3	2	2	3	2	3	3	2	3	3	2	2	3	3	3	2	2	2	3	2	2	2	2	2	2	3	2	2
1498	0	42	11	3	1	4	2	4	3	3	1	3	1	1	1	4	4	1	1	3	1	1	1	2	4	4	4	2	2	4	3	3	4	1	4	2	3	1	1	3	2	1	3	3	1	4	3	1	1
1499	0	41	11	3	3	3	4	2	3	1	1	4	2	3	3	2	3	3	3	2	2	2	3	2	2	2	3	3	3	2	3	2	3	3	3	3	2	3	2	3	3	3	2	3	3	2	3	3	2
1500	1	33	6	2	4	3	3	3	2	3	3	1	1	2	2	2	1	3	2	2	2	1	1	2	2	2	2	2	2	2	2	2	2	2	1	1	1	2	2	2	2	3	3	3	3	2	2	4	2
1501	1	43	11	3	4	3	2	2	3	2	1	3	1	3	3	3	1	2	3	2	4	1	1	2	2	3	2	3	2	2	3	2	3	1	3	3	1	2	2	3	2	4	1	4	1	3	3	3	3
1502	0	28	11	1	2	1	3	3	4	2	1	3	3	2	2	3	3	3	1	4	2	3	1	2	1	3	2	2	4	4	2	2	4	3	2	3	2	4	1	2	3	2	2	4	3	1	1	3	3
1503	0	35	11	3	2	2	4	4	3	2	2	3	3	3	3	3	3	3	3	4	3	3	3	2	2	2	3	2	1	2	3	2	4	2	3	3	2	3	3	3	2	3	2	4	3	1	2	3	2
1504	1	31	11	4	2	3	3	3	3	1	2	3	1	2	2	3	2	1	2	4	2	1	1	1	2	2	2	4	1	2	3	3	3	2	3	2	2	3	2	3	2	2	2	3	3	2	4	3	2
1505	0	32	15	1	4	2	4	1	1	1	1	4	1	2	3	2	2	4	1	2	1	1	1	1	1	3	2	3	4	1	3	4	4	2	4	4	1	3	1	3	4	3	1	4	3	1	2	1	2
1506	1	26	11	1	1	3	3	2	3	1	1	3	2	3	3	3	1	3	1	3	4	1	1	1	3	1	1	4	2	1	4	3	4	1	3	3	2	3	3	4	3	3	1	1	1	3	2	3	1
1507	0	33	11	1	4	4	4	4	1	1	2	3	1	3	2	3	4	3	2	3	1	1	2	2	4	4	3	2	3	4	2	3	3	3	3	4	2	3	1	3	4	2	1	4	2	4	3	2	2
1508	1	30	11	1	3	3	3	4	4	3	2	4	2	3	2	4	2	3	2	2	3	2	1	1	1	3	3	3	2	2	4	3	3	2	4	3	2	3	1	4	2	3	3	3	3	2	3	3	2
1511	1	37	11	2	3	4	3	3	2	4	1	3	4	4	3	3	2	1	2	2	3	2	4	2	1	1	3	1	2	2	3	2	1	2	3	3	3	2	1	3	3	3	3	4	3	2	3	3	2
1513	0	31	10	3	3	3	2	2	2	2	2	2	2	2	3	2	2	2	2	2	3	2	2	3	4	2	2	3	2	2	2	2	3	3	3	2	2	2	2	2	2	3	3	2	2	3	3	3	2
1516	1	41	16	4	3	2	4	4	3	2	1	4	1	4	3	4	3	4	3	3	1	2	2	1	1	2	4	1	3	1	4	4	2	1	4	4	1	3	2	4	3	2	1	4	2	1	2	3	1
1517	0	41	11	2	1	2	2	3	3	3	1	3	1	4	2	4	3	1	2	2	2	1	3	3	2	4	1	4	1	3	4	2	1	2	4	3	2	2	3	4	4	1	3	4	1	3	4	1	3
1519	1	24	10	3	1	2	4	3	3	2	2	4	2	3	2	3	4	3	1	4	2	2	2	1	1	3	3	3	2	3	2	2	4	3	2	1	2	4	3	2	3	2	2	3	2	4	2	2	3
1520	0	33	11	2	1	3	4	4	2	2	2	4	1	4	4	3	2	4	2	1	3	3	2	1	1	3	3	3	2	3	3	2	3	2	2	4	1	1	1	3	4	3	1	4	2	1	4	3	1
1521	0	39	11	1	1	3	3	2	2	3	1	3	3	3	1	2	3	3	2	2	1	1	4	1	1	4	3	4	3	4	3	3	1	2	3	3	3	1	1	3	3	1	1	3	3	1	4	1	2
1523	1	57	11	3	3	3	3	3	2	2	1	3	2	2	2	2	3	3	3	3	3	2	2	2	2	3	2	3	2	2	2	3	3	3	2	2	2	3	2	3	3	3	1	4	2	2	3	2	3
1524	1	27	11	2	3	3	3	3	4	3	2	3	1	3	3	3	3	2	3	3	3	2	2	3	3	3	3	3	3	2	3	2	2	2	2	2	3	3	3	3	3	3	3	3	3	3	3	3	3
1525	0	23	11	3	2	3	3	3	4	2	1	4	3	3	4	4	2	2	4	3	3	1	2	1	1	1	3	3	2	1	3	3	2	2	3	3	1	3	1	4	3	3	2	4	1	1	4	3	1
1527	0	19	11	1	3	3	3	2	3	3	1	3	2	3	3	3	1	3	3	2	3	3	2	3	2	1	3	4	3	2	3	2	3	3	3	3	3	4	2	3	2	3	2	3	2	3	2	3	2
1528	1	39	11	3	4	3	4	2	4	2	1	4	3	4	4	4	2	4	4	3	4	3	1	1	2	2	2	2	3	1	4	3	2	2	3	4	1	3	1	4	4	4	2	4	2	2	3	4	2
1529	1	26	11	3	2	2	4	2	3	3	1	4	3	3	3	3	2	2	2	2	3	2	3	3	2	2	3	3	2	2	3	3	2	2	3	4	2	3	1	3	3	3	2	3	2	2	3	3	2
1532	1	36	11	1	3	3	3	2	3	3	3	3	3	3	2	3	4	2	3	2	3	1	3	1	1	2	3	2	2	2	3	3	1	2	4	3	1	2	2	3	3	3	1	3	3	1	3	3	1
1533	1	25	11	3	3	4	4	2	2	2	1	4	1	1	2	2	1	1	3	1	3	1	1	1	1	3	1	3	2	3	2	3	4	1	3	1	1	2	1	4	3	3	1	4	1	1	3	4	1
1534	0	31	11	3	2	4	4	2	3	2	1	4	3	4	4	4	4	3	1	1	3	2	2	1	1	1	3	1	1	2	3	2	2	1	4	4	1	2	1	3	4	3	1	2	3	2	4	2	1
1535	0	26	11	3	3	3	3	4	3	3	3	3	4	3	3	3	3	3	4	3	3	3	3	3	3	3	3	3	3	3	3	2	3	3	3	3	3	3	4	4	4	3	3	3	3	3	3	3	3
1536	0	65	11	1	2	3	3	2	4	4	2	3	2	3	3	4	3	3	2	3	3	2	3	2	2	2	4	2	2	2	3	2	2	2	3	2	2	2	1	3	3	3	3	2	4	3	3	3	2
1537	0	38	11	2	4	2	3	4	2	3	3	4	1	3	2	3	3	4	2	2	1	2	1	3	2	1	1	2	4	3	2	4	3	3	2	3	2	3	1	2	3	3	3	2	1	3	3	2	3
1538	1	61	11	1	3	2	3	3	3	2	1	3	2	2	3	3	4	2	3	2	3	2	2	2	2	2	2	2	2	2	2	3	3	2	4	2	2	3	2	2	3	2	2	2	2	3	4	3	3
1539	0	39	11	3	2	2	4	3	3	2	1	4	1	4	3	3	3	4	2	2	1	1	1	1	1	1	1	3	2	2	4	3	3	2	4	3	1	2	1	4	4	2	1	4	1	1	3	2	1
1540	0	48	11	1	2	2	4	1	1	3	2	4	3	3	3	4	4	3	4	1	2	1	2	1	1	1	4	2	2	1	2	1	2	2	3	2	1	3	1	3	3	3	1	4	2	3	2	3	2
1541	0	24	11	3	1	3	2	2	3	2	1	2	1	2	1	3	2	1	2	3	2	1	2	2	4	4	3	3	1	4	2	3	3	3	3	2	2	2	2	2	2	1	3	1	2	3	3	2	3
1543	0	24	2	3	3	2	3	4	2	3	2	3	3	3	2	4	2	4	2	4	3	2	4	1	1	3	4	2	3	3	4	3	1	2	4	3	2	4	1	4	4	2	1	3	3	2	3	3	1
1544	1	38	11	2	2	1	4	3	3	3	2	4	1	3	3	3	2	4	4	2	3	2	2	2	1	1	3	3	2	2	4	4	4	2	3	4	1	3	1	3	4	3	1	4	1	1	3	3	1
1546	1	34	11	1	4	4	4	4	4	4	1	4	4	4	4	4	4	4	4	4	4	1	4	1	1	3	3	3	3	3	3	3	3	1	3	3	1	3	1	3	2	3	1	3	3	1	3	3	1
1547	1	28	15	1	3	2	4	2	3	3	1	3	3	3	3	3	2	2	3	2	2	2	3	2	1	2	4	3	2	1	4	2	2	1	4	3	1	3	1	4	3	3	2	2	1	3	4	2	2
1548	1	36	11	3	2	4	2	2	3	3	1	2	1	1	1	2	2	1	3	1	1	1	2	3	3	3	3	3	1	3	2	3	3	3	3	2	2	1	2	2	2	1	1	2	2	3	4	2	3
1550	1	47	14	4	3	2	3	3	1	1	2	3	1	2	2	3	2	2	3	3	3	3	1	2	2	3	3	3	2	2	3	3	3	2	3	3	2	2	3	3	3	2	3	2	1	2	3	3	2
1551	1	28	11	3	2	3	4	3	3	3	1	4	2	2	2	3	3	4	3	2	2	1	2	2	2	4	2	3	2	3	3	2	2	1	4	3	3	1	1	4	2	2	2	4	2	1	3	2	2
1553	1	28	11	3	2	4	3	4	4	1	1	4	1	2	2	2	4	3	4	2	2	2	2	2	1	3	3	3	1	3	3	2	4	3	3	2	2	2	4	4	4	3	1	4	3	3	4	2	2
1555	1	48	11	1	3	3	4	2	2	1	3	4	2	4	3	2	1	3	3	4	3	2	2	1	2	1	3	3	2	2	3	3	1	2	3	4	2	2	1	3	3	4	2	3	3	2	3	4	3
1557	1	22	11	3	3	3	3	4	2	3	2	3	3	1	3	3	2	2	2	4	2	3	3	2	1	2	3	2	3	2	2	2	2	3	3	2	1	3	2	2	3	3	2	3	3	2	3	3	2
1558	1	31	11	4	4	2	3	2	1	1	1	3	3	3	4	4	1	3	3	2	4	2	2	1	1	1	1	3	4	1	3	2	2	1	2	3	1	4	1	3	3	4	3	4	2	1	4	4	1
1563	1	34	14	2	1	3	3	3	2	2	3	3	2	1	1	2	4	3	3	2	3	1	1	3	2	1	3	2	3	3	3	4	1	2	4	3	2	2	2	3	3	2	1	4	3	2	3	2	3
1564	1	44	11	2	3	1	4	2	3	3	1	4	2	4	4	3	1	3	3	3	3	1	3	1	1	1	3	3	4	1	4	3	2	2	3	4	1	4	1	3	4	4	1	3	2	1	2	3	1
1565	0	31	11	3	3	3	3	2	3	4	1	3	1	3	3	4	1	4	3	2	2	2	2	2	2	1	4	4	2	1	4	3	4	1	4	4	2	4	1	3	4	4	3	4	1	2	3	4	2
1566	1	35	11	4	2	3	3	3	2	2	1	4	2	2	2	2	4	2	3	2	3	1	2	1	1	2	3	3	2	2	3	3	2	3	3	3	2	3	1	4	3	3	1	3	1	1	3	3	1
1568	1	59	6	1	3	2	3	1	1	3	1	4	1	3	4	3	4	4	4	1	4	1	4	1	1	1	1	1	4	1	4	4	4	1	4	4	1	1	1	4	4	4	4	4	4	4	4	4	1
1569	1	28	11	2	2	1	4	3	3	1	1	4	1	2	2	3	3	4	2	3	2	2	1	1	1	2	2	2	2	2	3	2	3	2	3	3	2	3	1	3	3	3	2	4	2	1	3	4	2
1570	0	26	5	3	3	1	3	2	4	3	1	3	2	3	3	3	1	4	4	4	4	2	3	2	1	1	3	3	4	2	3	3	3	3	3	4	1	4	2	3	3	4	1	3	3	2	4	4	2
1571	0	54	11	3	1	2	4	3	2	1	1	4	1	1	1	2	4	3	2	1	1	2	2	1	2	4	4	4	1	2	4	4	2	2	3	4	1	4	1	3	2	2	1	4	1	2	3	1	1
1572	1	28	3	4	3	3	4	2	2	4	2	4	4	4	4	3	3	4	4	2	3	3	4	4	2	2	4	3	4	2	4	4	4	4	2	3	2	4	2	4	4	4	2	4	3	2	4	4	2
1574	1	41	11	3	2	1	2	3	1	3	1	1	4	3	3	4	3	3	4	3	2	3	4	1	2	1	1	1	1	3	1	1	1	1	1	3	1	1	3	4	2	2	1	4	3	1	1	3	1
1575	0	35	2	3	3	2	3	3	3	2	2	3	2	3	3	3	3	3	3	3	2	2	2	2	1	1	3	1	2	2	3	3	2	2	3	3	1	3	1	3	3	3	2	3	3	2	3	3	1
1576	0	29	11	2	2	2	4	2	4	2	1	4	2	3	2	4	4	4	3	3	2	1	1	1	1	2	2	2	4	2	4	2	3	4	4	4	3	4	1	4	4	2	1	4	3	1	3	3	1
1577	0	50	11	3	1	2	3	2	3	3	2	3	2	2	1	2	2	2	1	3	1	3	2	2	3	4	3	3	3	3	2	3	3	3	3	3	3	3	1	2	3	1	1	2	2	2	3	1	2
1578	0	28	11	2	3	1	4	3	4	4	4	4	2	4	3	4	1	3	4	4	4	4	4	2	1	3	4	2	1	3	4	4	2	1	4	4	1	4	1	3	3	4	4	2	4	2	3	4	1
1579	1	28	11	1	3	4	4	4	1	4	3	4	1	3	1	4	3	3	2	3	3	1	4	2	1	4	4	3	1	4	1	2	2	2	4	1	2	1	2	1	2	1	4	4	1	4	4	3	4
1580	1	20	11	1	1	3	3	1	4	1	1	2	1	3	2	3	2	1	3	2	2	1	1	2	2	3	2	4	1	3	3	3	4	2	4	3	1	1	1	3	3	2	1	4	2	2	3	2	2
1581	0	35	11	3	3	2	3	3	1	3	1	3	1	3	3	3	3	1	3	3	2	1	3	2	2	2	3	2	3	3	2	2	3	3	3	3	2	2	2	3	3	2	2	3	2	3	3	3	2
1582	1	21	11	1	2	3	4	3	2	2	1	4	2	3	2	2	3	2	2	3	2	2	1	2	1	4	2	3	2	3	3	2	3	2	3	2	2	3	2	3	3	2	2	4	2	3	3	2	2
1583	0	19	2	1	3	3	3	3	3	3	3	3	3	2	2	2	2	2	2	2	2	2	2	2	2	2	2	2	2	3	3	3	3	3	3	3	3	3	3	3	3	3	3	3	3	3	3	3	3
1584	1	35	7	3	2	3	4	2	3	3	1	4	1	3	3	4	2	3	2	2	2	1	1	1	2	1	4	3	2	2	3	2	4	1	3	4	1	3	1	3	4	2	2	1	1	2	3	2	2
1585	0	28	2	3	4	4	4	3	4	1	1	1	1	1	1	4	4	4	2	4	1	4	4	1	1	3	3	4	2	2	3	4	1	2	2	4	1	1	2	4	4	1	1	4	4	1	1	2	1
1587	1	27	11	1	1	1	4	2	4	1	1	4	1	4	3	4	4	4	4	3	3	3	1	1	1	2	3	1	2	1	4	4	4	2	4	4	1	3	2	4	3	3	2	4	1	1	3	3	2
1588	0	28	5	4	3	3	3	3	3	3	3	3	3	3	3	3	3	3	3	3	3	3	3	3	3	3	3	3	3	3	3	3	3	3	3	3	3	3	3	3	3	3	3	3	3	3	3	3	3
1589	1	31	11	1	3	2	3	2	3	2	1	3	1	3	3	3	4	1	3	1	3	1	1	1	1	1	1	1	3	1	3	1	1	1	3	3	1	1	1	3	3	3	1	3	1	1	3	3	1
1592	1	28	11	3	2	3	4	1	3	2	1	4	3	3	2	4	2	4	4	4	4	3	1	2	2	2	2	4	3	2	3	3	2	2	4	4	1	2	2	4	3	4	2	4	1	2	3	3	2
1593	1	24	15	3	2	2	4	3	3	2	3	3	2	3	2	4	2	3	3	4	3	2	2	2	1	3	3	3	2	2	3	1	2	2	4	2	3	4	2	2	4	3	4	3	2	2	3	3	4
1594	0	22	11	2	3	2	3	3	3	3	3	3	3	3	2	2	3	3	4	3	2	2	1	3	3	2	3	2	3	2	3	3	3	2	3	3	3	2	3	3	3	4	3	3	2	3	3	3	2
1595	1	28	11	4	1	3	3	3	3	2	3	4	2	2	2	3	4	1	3	1	2	2	2	1	1	3	3	2	2	4	3	2	4	3	4	3	3	2	2	3	4	2	1	4	2	1	3	2	3
1596	1	28	6	3	2	2	2	2	3	1	2	3	1	1	1	2	4	3	1	1	1	1	1	1	1	4	3	2	2	4	2	4	4	4	2	2	3	2	2	2	2	1	1	1	1	2	2	1	3
1597	0	58	11	3	1	3	3	2	2	2	1	4	4	2	2	2	4	2	1	2	1	2	3	3	4	3	2	3	3	2	3	3	3	2	3	2	3	2	2	3	3	1	1	2	4	3	3	1	3
1598	0	22	11	1	4	2	4	3	3	2	1	3	1	4	4	3	3	3	4	2	3	3	1	1	1	1	3	3	1	1	4	4	3	4	4	3	1	4	2	4	3	4	3	4	1	1	2	4	2
1599	0	26	11	2	3	1	4	2	4	3	3	4	2	4	4	4	2	4	4	4	3	2	3	1	1	1	2	3	3	2	4	2	2	1	3	3	2	4	3	4	3	4	1	4	3	2	2	4	2
1600	0	42	11	4	2	2	4	4	3	3	1	3	1	3	3	3	1	4	2	4	2	2	1	2	4	1	3	2	2	3	3	2	4	3	4	3	2	4	1	3	2	3	3	3	1	2	1	2	2
1602	0	29	11	2	3	1	3	3	4	3	2	3	2	3	3	3	2	3	3	2	3	2	2	2	2	2	3	1	3	2	3	3	2	2	3	3	2	3	2	4	3	3	2	3	2	2	1	3	2
1603	1	22	11	3	2	3	3	3	3	3	3	3	2	3	2	3	4	3	3	3	3	3	4	3	3	3	3	3	2	2	3	3	3	2	3	3	3	4	1	3	3	2	3	3	3	3	3	2	3
1604	1	62	11	3	3	1	2	4	4	4	2	2	1	4	2	2	4	2	4	1	1	1	3	2	1	3	3	2	4	4	3	3	4	3	4	3	1	4	2	3	4	1	1	4	1	4	2	2	2
1605	1	22	11	3	3	3	4	2	2	3	1	4	2	3	3	2	1	2	3	3	3	1	2	2	2	2	3	3	2	2	3	2	2	2	3	4	2	3	1	3	3	3	1	4	2	2	3	4	2
1606	1	47	11	4	3	3	4	3	3	4	2	3	2	3	3	3	3	2	2	1	3	1	2	1	1	3	3	4	3	2	3	3	1	2	3	4	1	3	1	3	3	3	1	3	2	1	3	3	1
1609	0	23	11	3	4	3	2	3	4	3	2	2	2	3	2	3	2	2	2	1	4	2	2	3	4	2	2	4	3	3	2	2	3	2	3	4	3	2	3	3	3	3	3	3	3	2	3	2	3
1610	0	22	11	2	2	2	3	4	3	2	3	2	3	2	1	3	2	3	2	2	3	2	2	3	2	1	2	2	3	2	3	1	3	2	3	2	3	3	3	3	4	1	2	3	4	3	2	2	3
1611	0	27	7	1	1	3	3	3	3	2	3	3	1	4	3	4	3	4	2	3	1	3	1	2	2	2	3	3	3	2	3	4	2	3	4	4	3	3	2	3	3	2	3	4	3	2	3	1	1
1613	0	28	10	3	2	3	3	2	3	2	2	2	1	2	2	2	2	4	2	2	2	1	2	2	2	3	2	4	3	3	3	2	4	3	3	3	2	3	1	2	3	2	1	3	2	2	2	3	2
1616	1	45	11	1	1	2	3	1	1	4	1	3	1	2	4	4	2	3	2	2	3	2	1	1	1	1	3	3	3	3	2	3	3	1	3	3	3	2	1	2	3	3	1	3	2	4	3	3	3
1617	0	19	11	1	3	2	3	2	4	2	4	4	2	3	4	4	2	2	3	3	3	3	4	2	4	1	4	4	3	2	2	3	2	3	3	3	1	4	2	3	3	3	2	3	3	2	3	4	2
1618	0	25	11	2	3	2	2	3	1	2	2	3	2	2	4	3	1	3	2	2	2	3	3	2	2	2	3	3	2	1	2	3	3	2	2	3	2	2	3	2	2	4	3	2	3	2	2	3	2
1619	0	20	11	2	3	2	4	2	4	3	2	4	1	3	4	3	2	4	3	2	3	1	2	1	1	1	2	3	4	1	3	3	2	1	4	4	2	4	1	3	3	3	1	3	3	3	3	4	1
1621	0	24	15	2	3	3	4	4	3	2	2	3	2	2	3	3	3	4	3	4	2	3	2	3	1	3	2	3	3	3	2	2	4	3	3	2	3	3	2	2	3	2	2	4	1	2	3	3	3
1622	0	23	11	3	2	3	3	4	1	3	2	3	3	3	3	4	2	3	3	3	1	2	4	3	1	1	3	3	1	3	2	3	3	1	3	1	3	3	2	3	3	3	3	2	2	2	1	3	3
1623	1	35	10	4	3	3	4	4	3	2	1	4	2	2	3	4	4	3	3	3	2	1	1	2	4	1	2	2	2	2	4	3	4	2	4	3	1	3	3	4	2	3	1	4	1	1	3	3	3
1624	0	40	11	1	1	4	4	4	1	1	1	4	1	4	4	4	1	3	4	1	1	4	1	1	4	1	4	4	1	1	4	1	4	4	4	4	4	4	2	4	1	1	1	4	1	1	4	4	1
1626	0	19	2	1	4	3	4	3	1	1	1	3	1	3	3	1	1	4	3	1	3	1	1	1	1	1	1	3	4	1	4	4	3	3	3	1	1	3	2	3	3	3	3	3	2	2	2	4	2
1627	1	51	11	2	3	2	3	3	3	2	2	3	2	3	2	3	3	3	3	2	2	2	3	2	3	2	3	2	3	2	3	3	3	2	3	3	2	3	3	3	2	2	2	3	3	2	2	2	2
1628	1	25	10	4	3	3	3	3	3	3	3	3	3	3	3	3	3	3	3	2	2	2	3	2	2	2	3	2	2	3	2	2	3	2	3	3	2	3	3	2	2	3	3	2	2	3	2	2	2
1630	0	33	4	4	2	3	3	3	3	3	3	3	2	4	3	3	1	3	3	3	3	3	3	1	1	3	3	3	2	3	3	2	2	3	3	2	2	3	1	3	2	3	3	3	1	1	3	3	3
1631	0	22	11	2	2	2	3	3	4	4	2	4	4	4	1	4	4	4	3	4	3	4	2	4	3	1	3	4	3	4	4	4	4	3	3	4	3	4	4	4	2	1	1	1	1	2	1	1	2
1632	1	28	11	3	2	3	4	4	3	2	1	4	1	4	4	4	3	4	4	4	2	2	1	1	1	1	4	4	2	1	4	4	1	3	3	3	1	4	1	4	2	4	2	4	1	1	2	3	1
1633	0	61	11	1	1	3	3	2	2	2	1	3	2	2	1	2	4	3	1	2	1	1	2	2	1	4	2	2	1	4	2	3	2	2	3	2	3	1	1	3	3	1	1	2	2	1	3	1	3
1634	1	62	11	4	3	2	4	4	1	1	1	4	2	4	3	4	4	4	4	3	3	2	1	1	1	1	3	3	2	1	3	3	3	1	4	3	1	4	2	4	2	3	1	4	1	2	1	4	3
1635	0	34	11	1	4	2	4	3	4	4	1	4	4	3	2	4	2	3	2	3	3	1	4	1	1	2	4	1	2	2	4	2	1	2	4	3	1	3	1	4	3	3	3	4	4	3	3	3	3
1636	1	26	11	2	2	3	3	1	3	1	1	4	1	3	1	2	4	1	1	1	1	1	1	2	1	4	2	2	4	4	2	2	2	2	3	4	1	1	1	3	4	1	1	3	1	4	3	1	2
1637	1	59	11	4	2	3	4	2	3	3	1	3	3	2	1	3	3	2	2	1	2	2	3	2	2	3	3	3	3	3	2	2	2	3	3	2	2	1	2	3	3	2	3	2	2	3	3	2	3
1638	0	54	11	2	2	1	4	3	3	2	1	4	2	3	4	4	3	4	2	2	4	2	3	1	1	2	4	3	3	2	2	3	4	3	3	3	2	3	1	3	3	4	2	3	2	2	2	4	3
1639	0	29	7	3	2	4	4	1	3	2	4	1	1	3	3	3	1	2	4	1	1	2	3	3	4	2	2	1	3	2	4	3	3	3	1	2	1	1	4	4	3	2	1	2	2	1	4	3	3
1640	0	56	11	3	1	1	4	2	2	2	2	4	1	2	3	2	3	4	2	1	1	1	1	1	1	1	1	1	2	1	3	2	2	2	3	3	1	2	1	3	3	3	1	4	1	1	1	3	2
1641	1	33	11	3	3	1	3	3	3	3	4	4	3	4	4	4	1	4	3	4	3	4	3	4	1	2	3	3	3	1	3	3	2	2	3	3	2	3	2	3	3	3	2	2	3	2	3	3	2
1643	0	49	11	3	2	2	3	3	3	3	1	4	3	3	3	4	2	3	3	3	2	3	4	2	1	2	3	3	2	2	3	2	2	2	4	3	2	3	2	3	3	2	2	3	4	2	3	3	2
1645	0	20	11	1	3	1	3	2	3	2	2	3	4	4	2	2	1	3	4	3	4	3	4	1	1	3	4	2	2	3	2	4	3	3	3	2	1	3	4	3	2	3	4	3	3	1	3	4	2
1646	1	24	11	3	3	3	4	3	2	1	1	3	1	1	4	3	1	3	3	2	3	1	1	1	1	1	1	3	1	2	3	3	1	1	4	4	1	1	1	4	3	3	1	3	1	3	4	4	3
1647	0	36	11	4	3	2	2	3	2	2	2	3	1	3	3	4	3	3	3	4	3	3	3	1	1	2	4	2	3	2	3	3	4	3	3	2	3	3	2	3	3	3	3	4	2	2	1	3	1
1649	0	48	11	4	3	2	3	2	2	2	2	2	2	2	3	2	2	2	2	2	2	2	2	2	2	2	2	2	3	2	3	3	2	3	3	3	2	2	2	2	3	2	2	2	2	3	3	3	2
1651	0	20	11	1	3	3	3	1	2	2	1	3	1	3	4	3	1	3	3	2	4	3	1	2	1	1	2	2	2	1	3	2	3	3	4	3	1	4	1	3	3	4	2	4	2	2	3	4	2
1652	1	25	11	2	2	3	4	3	4	2	2	4	2	3	2	4	4	3	3	3	2	3	2	1	1	2	3	3	2	3	3	3	3	2	3	4	2	3	2	3	3	2	2	3	2	3	3	2	2
1653	1	32	11	2	2	3	3	3	3	2	1	2	2	2	2	2	3	3	3	3	2	2	3	3	3	3	3	4	4	3	3	3	2	2	2	3	2	3	2	2	2	3	3	3	3	3	3	3	3
1654	1	54	7	1	3	2	3	2	1	1	1	2	2	2	2	3	2	1	1	1	1	3	2	2	3	1	3	4	2	3	3	3	4	3	3	4	2	2	3	3	3	3	3	2	1	1	1	2	2
1655	1	23	16	2	2	1	4	1	4	4	1	4	3	4	4	4	3	3	3	4	4	2	3	1	1	1	3	3	4	1	4	3	3	1	4	3	1	4	1	4	3	4	1	4	1	3	3	4	1
1656	1	24	11	3	3	3	4	2	3	1	1	4	1	3	3	3	3	3	3	4	2	1	1	1	3	1	2	4	3	3	3	2	3	2	4	4	2	4	3	3	2	2	2	4	1	3	3	3	3
1657	1	18	11	1	3	2	4	2	3	3	1	4	3	4	3	3	2	2	3	3	3	1	2	2	1	3	2	4	2	3	3	3	2	2	3	3	2	3	3	4	3	2	1	4	3	3	3	3	3
1658	1	25	11	2	3	3	4	3	3	2	1	3	2	3	3	3	2	3	3	3	3	1	2	2	2	1	3	1	2	2	3	3	3	4	3	3	2	3	2	4	3	4	2	3	3	3	4	4	2
1659	0	26	13	2	3	3	3	3	3	3	3	3	3	3	3	3	3	3	3	3	3	3	3	3	3	3	3	3	3	2	2	2	2	2	2	2	2	2	2	2	2	3	3	3	3	3	3	3	3
1660	1	61	11	2	4	3	3	4	3	3	2	1	2	1	1	4	3	2	1	4	2	1	3	1	2	4	3	3	1	4	3	2	3	2	3	2	1	3	2	3	1	1	4	3	3	3	2	2	3
1661	1	45	11	3	2	3	3	3	1	1	1	3	1	3	3	2	3	2	4	2	3	1	1	1	1	1	2	3	3	2	3	3	2	2	3	3	1	3	2	3	3	3	2	3	3	2	3	3	2
1662	1	55	11	1	2	3	3	2	2	1	2	3	1	4	4	3	2	2	2	3	4	2	2	2	3	1	2	1	2	1	3	3	4	2	3	3	1	2	1	3	3	4	1	3	1	3	4	3	2
1664	1	29	7	2	3	4	3	3	4	1	2	4	2	2	1	3	4	4	2	3	2	2	1	2	1	3	3	4	2	3	3	2	3	2	3	3	3	2	2	3	3	1	2	4	2	2	3	2	3
1665	1	33	11	1	4	3	4	3	3	2	1	4	2	1	1	3	4	4	2	2	2	1	1	2	1	3	1	2	3	4	1	3	3	3	3	2	1	3	2	1	1	2	1	4	1	1	2	3	3
1666	1	50	11	1	2	2	4	3	2	4	1	4	3	3	3	2	3	3	2	2	2	2	3	1	1	3	2	2	3	2	3	3	1	2	3	4	1	4	2	3	4	3	2	4	2	2	3	2	2
1667	1	27	11	3	3	3	4	3	2	3	1	3	2	4	4	4	2	3	2	3	4	2	3	2	2	2	3	4	3	2	3	3	2	2	3	4	1	3	2	3	3	3	2	3	3	1	3	4	2
1668	0	25	11	3	3	2	3	1	3	1	1	3	1	1	4	3	1	2	2	1	4	1	1	3	1	4	2	1	4	4	3	4	3	2	3	3	3	4	3	3	4	4	1	3	1	1	1	4	1
1670	1	34	7	3	2	3	2	4	3	2	1	2	3	2	1	3	4	3	3	3	1	3	1	3	4	3	4	3	2	3	2	3	2	3	3	3	2	2	3	3	4	2	3	2	2	3	4	2	3
1671	0	26	11	2	2	3	4	3	3	1	3	4	2	3	2	4	1	4	3	3	2	2	4	3	2	2	3	2	1	3	4	3	2	3	3	3	2	2	2	3	4	2	2	3	2	2	3	2	3
1672	0	22	14	3	1	3	4	2	1	1	2	3	1	3	3	3	1	3	3	2	3	1	2	2	1	2	2	4	2	2	2	2	2	4	3	4	2	4	1	2	4	3	3	4	2	3	3	4	2
1673	0	44	11	2	2	2	4	4	2	2	1	4	3	1	3	3	2	1	3	3	3	2	2	2	2	1	3	2	4	2	4	3	3	2	4	2	2	3	2	2	2	3	3	4	3	2	3	4	2
1674	1	27	11	3	3	2	4	3	3	2	2	4	3	3	3	3	2	2	3	2	3	2	2	2	2	2	3	2	3	2	3	2	3	2	3	3	3	3	2	3	3	3	2	3	2	2	2	3	3
1677	0	25	15	2	3	2	4	4	4	4	4	4	4	4	1	4	4	3	4	4	1	4	4	2	3	3	4	2	2	4	2	2	2	4	4	4	4	3	2	3	2	2	4	3	4	3	4	2	2
1678	1	25	10	3	3	2	1	3	2	4	3	2	1	2	3	4	2	3	1	2	3	2	1	2	3	1	2	3	2	1	2	4	3	1	2	4	3	1	2	4	2	1	2	4	1	2	1	2	4
1679	1	25	11	2	2	3	3	4	4	2	1	4	3	4	3	4	4	2	3	4	1	2	4	1	1	1	3	1	3	2	3	1	2	1	4	3	3	4	4	4	4	1	3	3	3	1	3	2	3
1680	1	24	11	3	4	3	4	4	3	3	1	4	2	3	3	4	2	3	3	3	3	1	1	2	1	2	3	2	2	1	3	3	3	4	3	3	2	3	3	4	3	3	1	3	1	3	3	4	2
1683	1	23	11	3	3	2	3	4	2	3	2	3	2	3	3	4	2	1	3	2	3	3	2	3	1	3	2	3	2	3	2	2	2	3	3	2	4	1	2	3	2	3	2	3	1	3	3	4	2
1684	0	47	11	2	2	2	3	4	4	3	3	4	2	1	1	4	4	4	2	2	1	2	2	2	1	4	4	2	1	4	3	2	3	2	3	3	3	3	1	3	1	1	3	3	2	3	3	1	2
1685	1	64	11	3	2	3	2	3	3	2	2	3	3	1	1	2	4	2	2	3	2	3	2	3	1	3	3	2	1	3	2	3	3	3	2	2	3	2	3	3	2	2	3	3	3	2	3	2	3
1687	0	57	11	3	1	1	4	4	2	3	2	4	3	3	3	4	3	2	3	4	3	2	3	1	1	2	4	2	2	3	4	4	3	2	3	3	3	4	2	4	2	2	2	4	3	3	4	3	2
1688	1	21	11	1	1	2	3	3	3	2	1	2	2	3	1	3	1	2	1	4	3	3	1	2	3	4	4	1	3	4	3	2	3	3	3	1	2	3	4	4	3	1	1	3	1	2	3	2	2
1689	1	33	11	4	2	2	2	4	2	3	1	3	1	2	3	2	2	2	3	1	2	2	1	1	1	2	2	3	2	3	3	4	4	3	3	3	2	3	1	4	2	2	1	4	1	2	2	3	2
1690	0	20	11	1	2	3	3	2	3	2	1	3	2	2	3	3	2	2	2	2	3	2	3	2	1	2	3	4	3	3	2	3	2	2	3	3	1	3	2	4	3	2	2	3	2	2	3	3	2
1691	1	31	14	2	3	4	3	4	2	1	4	4	2	3	4	2	3	1	3	3	4	3	1	1	1	3	2	3	4	3	4	3	4	4	4	3	3	2	2	3	4	3	2	4	2	4	2	3	3
1692	1	25	10	2	2	2	3	4	4	2	1	4	2	1	1	4	4	4	1	4	2	3	1	2	1	4	4	4	1	4	2	2	4	2	3	4	3	1	2	1	1	1	1	3	3	3	4	2	2
1694	1	47	6	4	2	3	3	3	3	3	2	3	2	3	3	3	2	2	2	3	3	3	3	3	3	2	3	4	4	2	3	4	3	3	3	3	3	3	3	3	3	3	2	1	3	3	3	3	3
1695	0	39	11	3	2	3	3	3	3	2	2	3	2	1	1	1	3	2	3	2	2	3	3	3	2	3	2	3	3	4	2	3	4	3	3	3	2	2	3	1	2	1	2	3	1	3	2	1	3
1696	1	47	11	2	3	3	2	2	3	2	2	3	3	3	2	2	3	2	3	3	3	1	3	2	3	2	3	4	3	3	3	3	2	2	4	3	2	3	2	2	3	3	2	4	2	3	3	2	2
1697	0	20	15	2	3	2	3	4	2	3	3	2	1	2	3	3	3	4	2	1	2	3	2	2	4	3	3	4	2	2	3	2	4	1	3	3	1	4	4	3	2	3	1	2	2	4	4	4	2
1698	0	46	11	1	2	3	3	3	2	1	1	3	1	3	3	1	1	3	1	2	2	2	2	1	3	3	2	3	2	1	3	3	2	3	3	3	2	3	1	3	4	3	3	3	1	2	2	3	2
1699	0	21	11	2	4	2	2	1	2	3	3	3	3	3	3	3	4	4	2	2	2	3	3	4	2	3	2	3	3	1	2	2	3	3	3	3	3	3	3	2	3	4	3	2	3	3	4	2	3
1700	0	39	10	1	3	2	4	3	1	1	1	3	1	2	3	4	4	4	2	3	2	1	1	1	1	3	3	1	3	2	2	2	4	2	2	1	2	3	2	3	2	2	2	4	3	1	3	2	3
1701	0	30	11	4	2	2	2	2	2	2	2	2	3	3	3	3	2	2	2	2	2	1	2	3	3	2	3	2	2	2	2	3	3	2	2	2	2	2	3	3	2	2	2	2	2	2	2	3	2
1703	1	22	11	2	2	3	3	3	3	2	2	3	1	3	4	3	3	2	3	4	4	3	1	2	3	2	2	2	2	2	3	2	4	2	3	2	2	3	3	3	2	3	2	3	3	2	2	3	2
1704	0	29	11	2	3	4	4	2	4	4	2	4	2	3	3	4	3	3	3	3	4	4	1	1	1	3	3	4	2	3	4	2	3	3	4	3	2	2	3	3	3	4	2	4	3	2	4	4	2
1706	1	39	11	2	2	3	3	3	2	1	1	4	1	1	3	2	3	4	4	2	4	3	1	2	1	1	1	3	1	1	2	3	4	4	1	2	1	2	1	2	1	4	1	4	1	1	2	4	3
1708	0	32	11	3	1	3	3	2	2	2	1	2	1	1	1	2	4	2	1	2	1	1	2	2	3	4	2	2	1	4	2	3	3	1	3	2	2	1	2	2	3	1	1	2	2	3	3	1	3
1709	0	46	7	1	3	4	4	3	2	1	1	3	3	3	4	3	1	4	3	4	4	2	1	1	3	1	1	4	2	1	3	3	1	1	4	4	1	2	2	4	4	4	3	2	2	2	4	4	1
1710	1	51	11	3	3	2	3	3	4	2	1	3	2	4	4	4	2	1	3	4	2	2	3	2	2	1	2	2	2	2	3	3	2	2	3	3	3	2	2	3	3	3	2	2	1	2	3	4	2
1712	1	23	11	4	1	4	4	4	4	4	3	3	2	1	1	4	1	2	2	3	1	2	4	2	1	4	4	3	1	4	3	4	4	2	3	3	4	2	4	3	1	1	4	4	2	4	4	3	2
1713	0	24	15	1	1	4	4	3	4	4	1	4	3	3	4	4	1	4	3	3	2	3	4	1	1	1	4	4	4	1	4	4	1	1	4	4	1	4	1	4	4	3	2	3	4	2	3	3	2
1714	0	19	12	2	1	2	4	4	3	4	4	4	2	3	1	4	4	4	1	4	2	4	4	2	1	4	4	2	1	4	2	2	3	1	3	3	4	2	3	2	3	1	4	4	4	4	4	2	3
1715	0	23	14	1	3	2	3	2	3	3	2	3	3	3	3	4	3	2	3	3	3	2	3	2	2	2	2	3	2	2	2	2	1	1	4	3	2	3	2	3	3	3	1	2	2	2	3	3	2
1716	1	26	6	1	2	2	3	3	4	3	2	3	3	2	2	4	3	3	3	3	2	2	3	2	2	3	4	3	2	3	3	3	2	2	3	3	3	3	3	3	2	2	3	2	4	2	3	3	3
1717	1	28	11	2	3	1	3	3	3	4	3	4	4	4	4	4	4	4	2	4	4	4	1	1	1	1	1	3	3	4	4	4	4	4	4	4	4	4	1	4	4	4	4	4	4	4	4	4	1
1718	0	29	7	2	3	4	3	3	4	3	3	4	2	3	4	4	1	3	4	2	4	3	3	2	2	1	3	2	3	1	3	3	3	2	4	3	1	3	1	3	3	4	4	1	2	2	3	4	2
1719	1	27	2	3	2	3	3	2	2	2	4	2	1	1	1	3	3	3	2	2	2	1	1	2	2	4	3	1	2	4	2	3	4	3	3	1	2	2	3	2	3	1	2	3	1	2	3	1	2
1722	1	47	11	2	1	4	1	4	4	4	1	3	1	1	1	1	3	1	1	1	1	1	1	2	2	3	1	3	4	3	1	4	4	4	3	1	2	1	1	1	3	1	2	4	1	4	1	1	1
1723	0	28	7	3	1	2	3	1	2	1	1	1	1	3	1	3	1	3	1	1	2	1	1	1	4	4	1	2	2	4	3	4	4	2	4	3	1	4	1	3	3	1	1	4	1	3	4	3	3
1724	1	59	11	3	4	2	3	2	3	2	1	2	2	3	3	4	2	2	4	3	4	2	1	1	1	3	4	2	3	1	3	2	4	1	3	4	1	3	2	3	2	3	1	4	3	4	3	4	3
1725	0	27	11	1	3	3	3	3	2	3	2	3	3	1	3	3	2	3	3	3	2	3	2	3	2	1	3	2	3	3	2	3	1	2	2	3	2	3	3	2	3	2	3	2	3	2	3	3	3
1726	0	19	7	1	1	2	3	3	2	3	1	3	3	1	2	3	4	3	2	3	1	1	2	2	1	3	1	2	3	4	3	2	1	2	3	4	3	2	1	2	4	4	3	2	2	3	1	3	1
1727	0	33	15	1	3	2	4	2	2	1	1	3	1	3	2	2	3	4	3	1	3	2	3	2	1	3	2	4	3	3	2	4	4	4	3	3	1	3	1	2	3	2	1	4	3	1	3	3	3
1729	1	34	11	3	2	1	3	3	2	1	1	4	2	3	3	3	3	2	3	2	2	1	1	2	1	2	3	2	2	2	3	2	2	3	4	4	1	4	2	3	3	2	2	3	3	2	3	3	3
1730	1	31	8	4	2	1	3	3	3	3	1	3	3	2	4	1	1	1	4	1	3	1	4	1	1	1	4	4	3	1	4	2	3	3	4	4	1	4	2	3	2	3	1	2	2	3	2	4	2
1731	0	34	11	1	1	2	4	3	4	3	1	4	2	2	1	4	4	4	1	4	2	2	1	2	1	3	4	4	2	3	4	3	4	1	3	2	2	3	1	4	2	1	2	2	3	4	3	1	1
1732	1	29	10	3	2	3	3	3	4	3	2	3	2	3	2	4	3	3	2	2	2	2	3	2	1	4	3	2	2	2	3	2	3	2	3	3	2	1	2	3	3	3	1	4	1	3	4	2	2
1733	1	47	11	3	2	3	3	3	3	2	1	3	1	3	2	3	3	3	2	2	2	3	1	2	3	3	2	2	2	1	4	2	4	2	4	3	1	3	2	4	4	3	1	2	3	3	3	2	2
1734	1	43	15	3	1	4	3	3	3	3	2	4	2	3	3	3	2	2	3	2	3	3	3	1	2	2	3	3	1	2	3	3	2	1	3	3	3	1	2	3	2	3	2	2	3	3	3	4	3
1735	1	41	11	1	1	4	4	1	4	3	1	1	3	1	1	4	4	1	3	4	3	1	3	1	1	4	3	1	1	2	4	4	1	1	4	3	1	4	1	3	4	3	3	2	1	4	1	1	3
1736	1	21	11	2	2	3	4	2	4	4	1	4	3	4	2	4	4	4	2	3	1	1	4	1	1	2	4	2	2	2	4	2	1	1	4	4	3	1	1	4	3	1	3	2	1	2	3	2	1
1738	1	41	11	3	3	3	3	3	3	3	1	3	3	3	3	3	2	3	3	3	3	3	2	3	2	2	3	3	3	2	3	2	2	2	3	3	2	3	3	3	3	3	3	3	3	3	3	3	2
1739	1	25	11	3	3	2	4	4	3	2	1	3	2	4	3	4	4	3	3	2	2	2	2	1	1	3	3	3	3	2	4	2	3	2	3	2	3	4	2	4	3	2	2	4	2	1	2	3	1
1740	1	38	11	4	2	2	3	3	3	2	1	3	2	3	2	3	4	3	3	2	2	1	2	2	1	3	2	3	2	3	2	2	3	3	3	3	2	2	3	3	3	2	2	2	1	3	3	2	2
1742	0	18	11	1	3	4	4	4	4	3	2	3	2	4	2	4	2	3	2	4	2	2	3	3	2	3	4	4	3	4	3	2	3	2	3	3	3	3	2	3	3	2	2	3	2	3	3	3	3
1743	1	26	11	3	2	2	2	3	3	3	1	3	1	3	2	4	4	4	3	2	1	1	2	1	1	3	2	3	4	3	4	4	3	3	4	4	1	4	1	4	4	3	1	4	2	2	2	3	1
1744	1	62	11	3	2	1	4	1	4	4	1	4	1	3	4	2	2	2	4	1	2	1	2	1	1	1	4	4	2	1	3	2	1	2	4	1	1	2	1	3	4	4	1	4	1	1	3	4	3
1745	1	25	13	3	3	3	4	3	4	3	1	3	2	4	3	4	2	3	2	3	3	2	3	1	2	2	4	4	2	2	3	2	4	2	3	4	2	2	2	4	3	3	2	4	2	2	3	3	2
1747	0	55	11	3	2	3	3	3	3	3	2	2	3	3	3	3	3	2	2	2	2	2	4	3	2	2	4	1	2	2	3	2	2	2	3	3	2	2	2	2	3	2	2	3	2	2	4	2	2
1748	0	21	13	2	2	2	3	3	1	3	2	3	3	4	2	2	1	2	3	2	2	1	4	3	2	2	4	3	2	3	2	3	2	1	1	4	3	3	2	3	1	2	2	4	2	2	3	3	3
1749	1	53	11	3	1	3	3	3	1	4	1	4	3	1	1	3	4	3	2	2	3	3	3	1	1	4	3	3	2	2	3	4	3	4	4	4	2	4	1	3	3	3	2	1	1	3	4	2	4
1750	1	53	11	1	2	2	4	2	3	3	4	3	2	3	4	4	4	3	3	4	3	4	2	3	1	1	1	4	2	1	4	3	1	1	4	3	1	3	1	4	4	3	3	4	3	3	4	3	3
1751	1	29	5	3	2	2	3	3	3	2	1	3	1	2	3	2	3	2	4	2	3	1	1	1	1	1	2	2	2	2	4	3	3	2	4	3	1	2	2	3	3	3	3	2	1	2	3	3	1
1752	0	33	11	3	2	3	4	3	4	2	1	4	2	2	3	3	3	4	3	3	2	1	2	1	1	2	3	4	2	1	3	2	2	2	3	2	2	3	1	3	3	3	1	4	2	1	3	3	2
1754	0	33	11	3	2	3	3	2	3	4	2	3	2	3	3	3	1	3	3	3	3	2	3	2	2	2	3	3	2	3	3	3	2	2	3	3	2	3	3	3	3	3	2	3	3	3	4	4	2
1755	1	27	11	3	3	3	3	3	2	3	1	3	2	3	2	2	4	2	3	3	3	2	3	2	1	2	3	3	2	2	3	3	1	2	3	2	2	2	2	3	3	3	1	3	2	2	3	3	2
1756	0	28	10	2	2	3	3	3	4	4	1	4	3	3	1	3	4	3	1	3	1	1	3	2	2	4	3	3	2	1	3	3	1	2	3	2	4	1	2	3	3	1	1	4	3	3	4	1	2
1757	1	48	11	2	3	2	2	2	1	1	1	3	1	2	4	3	1	2	4	3	4	2	1	1	3	1	2	3	2	1	3	3	1	2	3	3	2	3	1	3	3	3	2	4	2	2	3	4	2
1758	1	28	11	4	3	3	3	2	2	3	1	3	2	2	2	2	2	2	3	2	3	1	1	2	2	3	3	4	2	3	2	3	4	3	3	3	2	3	2	3	3	3	2	3	1	2	2	3	2
1759	0	43	11	4	1	2	3	2	2	2	3	3	1	4	2	3	4	3	1	2	2	2	4	2	2	3	3	4	2	3	2	3	2	4	2	3	2	2	2	2	3	2	2	2	3	2	2	2	3
1761	0	28	11	3	1	3	3	4	2	1	1	3	1	3	2	2	4	3	2	4	4	2	1	2	3	3	1	4	2	1	3	3	4	2	4	2	4	3	3	3	3	3	2	4	3	1	2	1	2
1762	1	31	11	3	3	2	3	2	1	3	1	4	3	3	3	2	2	2	3	1	4	2	2	2	2	2	3	3	3	2	3	2	3	2	3	3	2	3	2	3	3	3	2	2	3	2	3	3	2
1763	0	41	11	1	2	3	3	3	3	3	2	3	2	3	2	3	3	2	2	3	2	3	3	2	2	3	3	2	2	3	3	3	2	2	3	3	2	3	2	3	3	2	3	2	3	2	2	2	2
1764	0	31	11	3	2	3	3	3	3	3	2	3	3	3	3	3	3	3	2	3	3	2	3	2	3	3	3	2	2	2	3	2	3	2	3	3	2	3	2	3	3	3	2	3	3	3	3	2	2
1765	1	21	11	2	2	3	4	3	4	4	3	4	2	4	2	3	2	2	2	1	2	1	1	2	2	3	3	3	4	3	3	2	2	2	4	4	1	3	1	3	3	2	1	4	2	3	3	4	2
1767	1	59	11	2	2	2	3	2	3	1	1	3	1	2	1	4	4	2	2	3	2	2	1	2	2	4	2	3	1	2	3	3	4	2	3	4	2	2	1	3	3	1	2	3	1	3	3	1	2
1771	0	58	11	2	1	1	4	4	4	2	1	4	1	1	1	4	4	1	2	1	1	1	1	1	1	4	3	1	2	4	2	2	2	2	2	3	1	1	1	2	4	1	1	3	1	1	4	1	2
1772	1	22	11	2	3	2	3	3	3	2	2	3	4	4	4	4	1	2	3	3	3	2	4	2	2	2	4	3	3	2	3	3	3	2	4	4	2	4	2	4	4	4	2	3	3	3	4	4	2
1773	1	37	11	1	3	2	4	1	3	3	1	4	2	4	4	4	2	3	2	4	4	2	2	1	1	1	3	2	1	1	4	3	3	1	4	4	1	3	1	4	3	4	2	4	4	1	4	4	1
1774	1	49	11	1	1	1	3	3	4	1	2	3	1	1	1	3	1	3	1	3	3	1	1	1	1	4	4	1	4	4	3	1	4	1	4	3	3	3	1	2	3	3	2	3	3	1	3	2	3
1775	1	41	11	4	3	3	3	3	3	2	1	3	1	2	2	2	3	4	3	3	2	3	2	1	1	3	2	1	3	3	3	3	3	3	3	3	1	3	2	3	3	2	1	3	2	3	3	2	2
1777	1	37	11	1	2	3	2	2	4	4	2	3	2	3	3	3	2	1	3	2	3	2	2	2	1	2	4	1	2	1	3	3	1	2	3	3	1	2	2	3	3	3	3	3	2	2	3	3	2
1778	0	41	11	3	2	3	4	4	2	3	1	3	2	1	2	2	2	1	2	3	2	4	2	2	2	2	3	2	2	2	2	2	3	3	3	1	2	3	1	3	2	2	2	3	1	2	2	2	2
1779	0	30	5	1	3	2	3	3	2	3	2	3	2	2	3	3	2	2	2	3	2	2	3	2	2	2	3	3	3	3	2	3	4	2	3	2	3	2	2	3	3	2	2	3	4	3	3	3	2
1781	1	61	11	3	3	3	3	3	3	3	3	3	3	4	3	4	4	4	1	1	3	1	4	1	1	1	4	4	4	1	4	4	1	1	4	4	1	1	1	3	4	4	1	4	1	1	4	3	1
1782	1	27	11	2	2	3	4	3	2	1	1	4	3	3	3	3	4	3	3	4	1	1	1	1	1	4	3	1	1	2	2	3	1	1	4	3	1	1	1	2	3	3	3	4	1	4	4	1	3
1783	0	60	11	4	2	1	4	3	3	4	1	4	2	4	3	4	3	4	2	3	2	1	4	1	1	1	4	3	3	2	4	3	2	1	4	4	1	4	1	4	4	3	1	4	3	1	2	3	1
1786	0	30	11	2	3	2	3	2	3	3	2	3	2	3	3	2	3	2	2	3	3	3	3	2	3	2	2	2	3	3	2	3	3	2	3	3	2	3	2	3	3	2	3	3	2	3	3	2	3
1788	1	65	11	2	3	1	4	1	3	4	1	4	3	3	3	4	4	3	4	4	3	1	4	1	4	1	3	2	4	3	4	4	4	1	4	4	1	3	3	4	4	4	1	4	4	1	3	3	4
1789	1	61	11	4	3	2	4	2	2	2	1	3	1	3	3	3	2	3	4	2	3	2	1	1	1	1	2	2	3	2	4	2	2	2	4	4	1	2	2	4	3	3	2	3	1	1	3	3	2
1790	1	22	11	3	3	4	4	3	1	4	1	4	1	2	2	3	4	1	3	1	3	1	4	1	2	3	2	3	3	2	2	4	3	3	4	3	2	2	2	2	3	3	1	1	1	3	4	3	2
1793	1	29	13	3	4	3	3	3	3	4	2	3	2	2	4	3	1	3	3	3	4	2	1	2	1	1	3	3	3	1	3	2	2	3	3	3	2	3	1	2	3	4	2	4	2	2	2	3	2
1794	1	21	11	2	4	4	4	3	4	1	1	1	1	4	4	3	1	4	4	3	4	2	1	1	4	1	1	4	2	3	3	3	4	1	4	4	2	3	2	3	2	3	2	1	2	2	4	2	3
1795	1	27	11	3	3	3	4	2	4	4	1	4	2	3	3	3	2	4	3	3	3	2	2	1	1	2	3	3	3	3	3	2	2	2	3	4	2	4	1	3	2	3	1	4	3	1	2	3	2
1796	0	31	5	3	3	2	3	3	2	3	2	3	2	2	2	3	3	2	3	2	3	2	3	2	3	3	4	3	3	2	3	2	3	3	2	3	2	2	4	3	3	2	3	2	3	2	3	2	3
1797	1	22	11	1	2	2	4	3	3	3	1	4	1	3	3	3	1	4	2	3	3	1	1	1	2	1	3	3	3	2	3	2	1	2	3	4	1	4	1	3	4	3	1	4	1	1	1	4	1
1800	1	28	11	2	3	3	3	4	2	4	1	4	2	2	2	3	4	3	3	3	2	1	1	2	1	3	2	1	1	3	4	4	2	2	4	4	2	3	2	4	3	2	1	2	4	4	4	2	2
1801	1	28	10	2	3	3	3	2	3	4	1	3	3	4	3	4	2	4	3	2	3	2	1	2	2	3	3	2	3	2	3	2	4	1	4	3	2	4	1	3	3	4	2	3	1	2	3	3	3
1802	1	25	11	3	2	3	3	2	3	3	1	3	1	2	1	4	2	1	2	2	1	1	1	2	1	4	2	3	2	3	3	2	3	3	3	3	2	3	1	3	2	1	1	3	1	3	4	3	2
1805	0	25	11	3	2	3	2	1	3	2	3	4	4	4	3	3	2	2	3	2	3	3	3	4	2	1	3	4	2	2	2	3	2	2	3	4	3	4	3	3	3	4	3	3	2	2	3	3	2
1806	1	28	11	4	2	2	3	3	3	1	2	4	2	3	2	3	2	2	2	3	3	2	2	2	1	3	2	2	3	2	4	3	3	1	4	3	2	3	2	3	3	3	2	4	3	2	2	3	2
1807	1	27	11	2	1	1	4	3	1	1	3	4	2	2	3	3	3	4	4	4	4	2	3	1	1	1	3	4	2	2	4	3	4	2	4	3	1	4	1	3	4	4	3	4	2	1	1	4	1
1808	1	26	6	3	2	2	3	3	3	2	1	1	2	1	1	2	2	3	1	2	2	1	2	1	3	2	1	2	2	1	2	2	2	3	2	1	3	2	3	2	2	2	2	1	2	3	3	2	2
1809	1	57	7	2	2	1	4	1	4	4	4	4	4	3	4	4	2	3	4	3	4	2	4	1	1	1	4	2	3	1	4	4	2	1	4	4	1	3	1	4	4	4	1	4	2	1	4	4	1
1810	0	35	10	1	4	2	4	2	3	2	2	4	2	3	4	3	2	4	4	3	4	2	2	2	3	1	3	2	3	2	4	4	3	1	4	3	1	4	1	4	2	4	3	4	3	1	3	4	1
1811	1	57	7	2	2	1	4	1	4	4	3	4	3	3	3	4	2	4	4	3	4	2	4	1	1	1	4	3	3	1	4	4	2	2	4	4	1	3	1	4	4	4	1	4	2	4	4	4	1
1812	1	48	11	3	2	3	1	3	3	2	2	3	2	3	2	3	3	3	2	2	2	2	2	2	2	3	3	3	3	3	3	2	2	2	3	3	2	3	2	3	3	2	2	4	2	2	2	2	2
1814	1	23	2	2	3	1	3	4	4	2	3	4	2	1	3	4	3	2	2	4	2	4	4	3	1	2	1	1	3	4	4	4	2	1	1	1	4	4	4	4	4	1	4	1	1	1	4	3	4
1817	1	54	11	3	4	3	4	4	4	4	1	4	3	4	4	4	3	4	4	4	4	2	4	1	1	2	4	2	4	1	4	4	1	1	4	4	2	3	4	4	4	3	4	4	2	1	2	4	1
1818	1	47	11	2	2	1	4	1	4	1	1	4	1	3	4	4	4	2	4	1	2	1	2	1	1	1	4	2	4	2	2	1	2	1	4	4	1	4	2	1	4	2	1	4	1	1	1	3	1
1819	0	26	11	3	3	4	2	2	3	3	2	2	1	3	2	4	3	2	1	3	2	2	3	4	3	2	3	3	3	1	3	2	3	4	3	3	2	2	3	3	3	3	3	2	4	1	3	3	2
1820	1	21	9	3	3	3	3	2	2	3	2	3	2	3	2	3	2	3	2	3	3	4	3	2	2	1	3	2	2	2	3	3	3	3	3	1	3	3	3	2	2	2	3	2	3	2	3	2	2
1822	1	54	11	3	3	3	1	1	2	1	1	3	1	3	4	2	1	2	4	2	4	2	1	2	2	1	1	4	3	1	3	4	2	3	4	4	2	3	1	3	3	4	2	3	1	2	3	4	2
1825	1	37	16	2	3	4	4	3	4	2	2	4	2	4	3	4	4	3	2	3	3	4	1	1	1	2	3	2	1	2	3	2	1	3	3	4	4	4	1	4	4	3	4	3	3	3	4	3	1
1826	1	39	11	2	3	4	3	3	2	2	1	4	2	3	3	2	2	2	3	2	3	1	2	2	1	3	3	2	2	3	2	3	3	3	3	3	2	3	2	3	3	3	3	2	3	3	3	3	3
1827	1	57	11	2	3	3	4	1	1	2	2	3	1	2	4	2	1	3	3	1	4	3	1	1	1	1	3	4	4	3	3	4	3	1	4	3	4	4	1	1	2	3	4	4	1	1	4	4	1
1828	0	35	11	1	1	2	4	3	2	1	3	3	1	3	1	1	4	1	3	4	1	1	3	1	4	4	4	4	1	4	4	3	2	1	4	2	1	2	1	3	4	1	3	1	3	1	4	1	1
1829	0	20	11	2	3	3	2	4	1	2	3	2	3	2	2	2	1	4	2	3	2	3	1	3	2	3	2	3	2	3	2	3	3	2	3	2	3	4	2	3	3	2	3	2	2	3	3	2	2
1831	1	41	10	2	3	3	2	3	3	3	2	3	3	3	2	3	3	3	3	3	3	3	3	3	1	3	2	2	2	3	3	3	3	2	3	3	2	3	3	3	3	3	3	3	2	3	3	3	3
1832	0	32	7	1	3	3	2	2	3	4	3	3	2	1	3	3	1	2	4	2	3	2	3	3	1	2	4	3	2	2	4	2	1	3	3	1	4	3	2	3	3	3	4	2	1	2	3	2	3
1833	1	29	2	4	4	4	4	4	4	4	4	4	4	4	4	4	4	4	4	4	4	4	2	4	4	1	4	4	1	3	4	4	4	4	1	4	2	1	1	1	1	4	4	4	4	4	2	4	1
1836	1	54	11	2	1	3	4	1	4	3	1	4	2	1	4	4	4	4	4	2	3	4	4	1	1	1	4	1	1	1	4	4	2	1	4	4	1	4	1	4	4	4	1	1	4	4	4	3	1
1837	1	38	11	2	2	2	3	2	3	3	2	4	2	2	3	3	3	3	2	2	3	2	3	2	2	2	2	2	1	2	3	2	2	2	3	3	2	2	3	3	3	3	2	3	2	1	4	3	2
1838	0	39	11	3	2	1	4	3	4	2	2	4	2	3	3	4	2	3	3	4	2	1	3	1	1	2	3	3	4	1	4	3	2	1	4	4	1	4	1	3	4	3	1	1	1	4	2	3	2
1839	1	34	9	2	1	1	4	4	4	3	4	3	2	4	4	4	3	4	3	3	4	4	4	2	3	1	4	1	1	1	4	4	3	2	4	4	4	2	2	4	2	4	3	2	4	4	3	3	3
1840	1	64	11	3	2	1	4	4	2	1	2	4	1	2	2	1	3	3	3	3	2	2	2	1	1	2	3	2	1	2	3	3	4	3	3	2	2	3	3	3	2	2	2	4	2	2	2	3	2
1841	1	29	6	2	2	2	4	3	1	1	3	4	4	3	4	4	1	2	4	3	4	3	1	1	1	1	4	4	4	1	4	1	2	1	4	4	1	4	1	4	4	4	2	4	1	1	3	4	2
1842	0	19	11	1	3	2	3	2	4	3	2	3	3	3	3	3	3	4	4	4	4	2	2	3	3	3	3	3	3	2	3	3	2	3	3	2	3	3	1	3	3	4	3	3	3	2	3	4	2
1843	1	24	7	2	3	3	3	3	3	3	3	3	3	3	3	3	3	3	3	3	3	3	3	3	3	3	3	3	3	3	3	3	3	3	3	3	3	3	3	3	3	3	3	3	3	3	3	3	3
1844	1	27	11	2	2	3	4	4	3	3	1	3	1	3	2	3	3	4	2	3	3	3	1	1	1	3	1	3	2	2	4	1	3	2	4	3	2	2	2	4	3	2	4	4	1	3	3	3	2
1845	1	40	11	3	4	3	3	1	1	1	1	2	1	3	4	2	2	2	3	2	4	1	1	2	3	1	1	3	2	1	3	3	3	2	3	3	1	1	1	3	3	4	1	3	3	3	4	4	2
1846	1	28	11	1	2	2	1	3	4	3	2	2	3	3	2	3	3	3	2	3	1	1	3	2	1	3	4	3	3	3	4	3	2	3	4	3	1	2	1	4	3	2	2	4	3	3	3	1	2
1847	1	27	11	3	2	3	3	1	2	1	1	3	1	3	3	3	4	1	2	3	3	1	1	2	2	1	1	3	2	1	3	3	4	1	3	4	1	2	1	4	3	3	1	2	1	2	4	4	1
1848	1	44	11	3	3	3	4	3	4	2	1	4	1	4	4	4	4	4	4	3	2	3	1	2	1	2	1	1	3	2	2	2	2	2	3	3	1	4	4	3	2	3	1	4	1	1	4	3	3
1849	1	56	7	3	2	1	4	3	1	1	1	3	1	3	4	2	4	3	4	3	3	1	1	1	1	1	2	2	3	1	3	4	4	2	3	3	1	3	1	3	4	3	1	4	1	3	3	3	2
1850	0	32	11	2	2	3	3	3	3	3	1	3	3	3	1	3	2	3	2	2	1	2	2	2	1	1	2	3	3	4	3	3	2	2	3	3	3	2	2	4	3	1	2	3	1	2	3	2	2
1851	0	24	11	2	3	3	2	2	1	4	3	2	3	3	4	2	3	3	2	4	3	3	4	4	3	2	2	2	3	2	2	3	3	2	4	4	2	2	3	2	2	4	4	2	3	2	4	3	2
1852	1	28	7	2	3	3	3	3	3	3	3	3	4	3	3	3	3	3	3	4	3	3	3	3	3	2	3	3	3	3	3	3	3	3	3	3	2	3	1	3	2	3	3	3	3	3	3	3	3
1853	1	24	13	1	2	3	3	3	4	4	2	3	2	3	2	3	3	3	3	4	2	2	2	2	1	3	3	3	2	3	3	3	4	3	3	3	3	2	2	3	3	2	3	3	3	3	3	2	2
1854	0	58	11	1	2	2	4	3	4	3	3	4	2	4	2	3	2	4	2	3	3	3	4	1	1	2	3	2	2	3	4	4	4	1	4	3	3	3	1	1	2	3	3	3	3	1	1	3	1
1855	0	35	5	3	2	2	4	2	3	2	2	3	3	2	3	3	3	3	3	3	3	3	3	2	1	2	3	2	3	2	3	2	2	2	3	3	2	3	2	3	3	3	2	3	3	2	3	3	2
1857	1	26	11	3	3	3	4	3	4	2	1	3	1	3	2	4	4	4	3	3	2	1	1	2	1	3	2	3	2	2	3	2	4	1	3	4	2	3	4	2	3	2	3	4	2	3	3	3	2
1858	0	55	11	3	1	3	3	2	4	3	1	4	1	3	3	2	3	4	4	1	4	1	1	1	1	3	1	1	2	3	4	4	3	3	4	3	1	4	3	4	4	4	1	2	3	1	3	3	1
1859	1	33	11	3	3	2	3	3	3	3	2	3	3	3	3	3	3	3	3	3	3	1	3	1	1	1	3	1	2	1	3	3	1	1	3	3	3	3	1	3	3	3	1	3	3	1	3	3	1
1860	0	54	10	4	3	1	3	3	3	3	1	3	2	3	3	3	3	2	3	2	3	2	2	2	2	2	3	2	3	2	3	3	2	2	3	3	2	3	2	3	3	3	2	3	4	3	3	3	2
1862	1	48	11	3	3	2	4	3	3	2	2	4	2	4	3	3	2	3	3	3	2	2	3	2	2	3	3	4	2	3	2	3	3	2	3	3	2	3	2	4	3	3	2	3	2	2	3	3	2
1863	0	45	11	3	2	2	3	3	3	3	2	3	2	3	3	3	2	3	3	2	2	2	2	2	2	2	3	2	3	2	3	3	2	2	3	3	2	3	2	3	3	3	2	3	3	2	2	3	2
1864	1	46	11	4	3	3	3	2	2	2	1	3	2	2	3	3	3	2	2	1	3	2	2	1	1	2	2	2	2	2	3	2	3	2	3	3	2	2	2	3	3	3	2	3	1	2	3	3	2
1866	1	59	11	2	2	3	4	2	4	4	3	2	2	3	1	4	2	2	2	3	1	2	3	2	4	3	3	2	1	4	3	3	1	4	3	4	2	2	1	3	3	1	1	3	4	2	3	2	3
1867	0	30	11	4	3	3	3	3	3	4	2	3	2	3	3	3	3	2	3	3	3	3	2	2	2	3	3	2	2	2	3	3	3	3	3	3	3	3	2	3	3	3	2	3	3	3	3	3	3
1868	1	36	7	2	1	1	4	4	4	4	1	4	4	4	1	4	4	4	4	4	4	1	4	1	1	4	4	1	1	4	4	4	1	1	4	4	1	4	1	4	4	4	1	4	4	1	4	1	4
1869	1	54	11	4	2	3	2	2	3	2	1	2	2	3	3	3	3	2	2	3	2	2	2	2	2	2	3	2	2	3	3	3	2	2	3	3	2	2	1	3	2	2	2	3	2	2	3	2	2
1872	1	48	11	1	3	3	2	1	4	4	2	4	2	4	1	4	4	3	3	1	3	1	2	2	2	4	4	1	2	2	4	4	1	2	4	4	1	4	1	3	4	2	1	2	1	1	3	3	2
1874	1	57	11	1	2	3	2	4	3	2	1	3	1	1	1	2	4	2	2	2	3	1	1	3	1	3	1	1	2	3	3	3	2	2	3	4	2	2	2	3	1	1	1	1	1	1	4	2	3
1875	1	24	11	1	4	3	3	3	2	1	1	4	1	2	1	2	4	2	3	2	1	1	1	1	1	4	2	1	2	3	2	2	4	3	3	3	1	3	2	3	2	1	1	4	3	1	2	2	2
1876	1	44	6	2	3	3	4	3	4	3	3	4	1	3	4	4	3	3	4	4	2	3	4	4	3	3	4	4	3	3	3	3	3	4	4	1	1	1	4	3	3	1	2	4	3	3	2	2	2
1877	0	40	11	3	3	2	4	3	2	4	1	3	2	3	3	4	2	3	3	4	3	1	4	1	1	1	4	3	2	1	4	3	2	3	3	2	3	4	1	3	2	4	2	3	3	2	1	4	2
1879	1	42	11	1	3	1	4	3	4	2	1	2	1	1	2	3	3	1	2	2	2	1	1	4	4	3	3	1	2	3	2	3	3	2	3	3	1	3	1	2	3	1	1	1	1	2	2	2	3
1880	1	35	11	3	2	3	2	4	4	1	1	2	1	1	1	4	3	1	3	4	1	2	2	3	1	2	4	2	1	4	3	2	4	1	2	1	4	1	1	3	1	1	2	3	2	2	4	2	3
1881	0	27	11	3	2	3	4	3	3	3	2	2	2	3	3	4	2	3	2	3	1	2	3	2	3	1	3	3	2	2	3	4	1	3	3	4	1	2	1	3	2	3	1	2	2	3	4	4	2
1882	0	18	11	2	2	3	3	4	2	4	1	3	4	3	1	3	4	3	4	4	2	1	4	2	2	3	4	3	1	3	3	4	2	2	4	3	4	3	1	3	4	3	4	4	3	1	3	1	2
1883	1	25	7	1	3	2	3	2	2	3	1	3	2	3	3	3	2	1	3	2	3	2	1	2	3	2	3	3	3	2	3	3	2	1	4	3	2	3	4	2	3	3	2	4	2	3	2	3	2
1884	0	22	15	1	2	3	4	3	3	1	1	4	1	2	2	3	3	3	2	3	2	1	1	2	1	3	1	4	1	3	3	2	4	2	3	3	2	2	2	2	3	1	2	4	1	2	1	1	3
1885	0	32	11	2	4	1	3	4	2	3	1	4	1	4	4	4	2	1	3	4	3	1	1	2	1	1	3	1	2	1	3	2	1	1	4	4	2	4	1	4	4	3	1	4	1	4	4	4	1
1886	1	25	11	3	1	2	2	3	3	3	3	3	1	3	4	4	2	3	3	3	3	2	1	1	2	2	3	3	3	1	4	3	2	2	2	4	1	4	1	4	4	4	1	4	2	2	4	4	2
1887	1	23	11	3	3	3	3	3	3	2	3	2	3	3	3	2	2	2	3	3	3	2	2	2	2	3	3	3	2	2	3	3	3	2	3	2	2	3	2	3	2	2	3	3	2	2	3	3	2
1889	1	56	5	3	2	2	2	1	1	2	1	2	1	2	2	1	4	1	3	1	4	2	1	2	4	3	1	2	3	2	3	2	3	2	4	3	3	2	3	3	3	2	1	3	1	2	3	2	2
1890	1	54	11	2	2	3	4	3	2	2	1	4	1	2	4	3	2	2	3	3	3	1	2	2	1	1	1	2	2	1	3	3	3	2	3	3	1	2	2	3	3	4	1	3	2	3	4	4	2
1891	0	30	11	3	2	3	3	3	2	2	2	2	2	2	2	3	2	3	2	2	3	2	2	2	3	2	2	2	3	3	3	2	2	2	3	3	2	3	2	3	3	3	2	3	1	2	2	3	2
1892	1	40	11	1	4	2	2	3	3	4	1	4	3	4	2	3	3	2	3	1	1	1	3	1	1	3	3	2	3	4	3	3	4	2	3	3	2	3	2	3	3	1	3	4	3	3	2	2	3
1893	1	47	11	4	3	2	3	2	4	3	1	3	1	2	4	4	2	3	3	2	4	2	1	1	1	1	2	2	3	1	4	3	1	1	4	3	1	3	2	4	3	3	1	2	1	3	3	4	1
1895	1	41	11	3	3	2	4	2	3	3	1	3	3	3	3	3	4	3	3	3	4	2	1	4	1	1	3	3	3	3	3	3	3	1	3	3	3	3	1	3	3	3	3	3	3	3	4	4	4
1896	0	22	11	3	2	3	2	2	3	4	3	3	2	3	3	4	2	3	2	3	3	3	4	2	3	2	4	2	2	2	3	3	1	3	3	3	2	2	1	3	4	3	2	3	4	3	3	3	2
1897	1	48	13	1	4	2	2	4	1	1	1	1	1	1	3	3	2	3	3	3	4	4	1	1	1	3	1	1	1	1	3	1	3	1	4	1	1	3	1	3	1	4	4	4	1	1	3	3	1
1898	1	20	11	1	3	3	2	2	3	1	3	2	1	2	3	2	1	2	3	2	3	2	1	2	1	1	1	2	2	3	2	3	3	2	3	2	2	4	1	2	2	3	1	4	1	3	3	4	2
1899	0	45	11	3	2	2	4	3	3	1	1	2	1	3	2	3	2	4	3	2	2	3	1	1	1	3	2	2	2	2	3	3	3	2	3	3	4	2	1	3	3	2	2	4	1	1	2	2	2
1900	1	24	7	4	2	3	4	4	4	1	1	4	1	3	2	4	4	4	3	4	1	1	1	1	3	4	4	4	3	4	4	4	3	1	4	4	1	4	1	4	4	1	1	1	1	4	4	2	1
1902	1	56	11	4	3	2	4	3	1	1	1	4	1	4	3	2	4	3	3	2	3	3	1	1	1	1	2	2	3	1	3	3	3	3	3	4	1	3	1	4	3	4	2	4	1	2	2	4	1
1905	1	36	11	1	3	2	4	2	4	3	1	4	3	4	1	4	3	3	2	3	3	1	3	1	3	2	4	2	2	3	4	2	2	1	4	3	2	3	1	4	4	2	2	4	2	1	3	2	1
1907	0	61	11	3	2	2	3	2	4	2	1	3	1	4	4	3	2	3	2	3	4	2	1	2	2	2	2	2	3	1	4	2	2	2	4	4	1	3	1	4	3	4	1	3	2	3	3	3	2
1908	1	43	11	2	1	2	4	3	4	4	1	4	3	3	2	4	2	3	3	4	3	1	3	2	1	2	4	2	3	2	3	2	1	1	3	3	1	3	1	3	3	3	2	4	3	1	3	3	1
1909	0	60	11	3	1	1	2	3	2	2	2	3	2	3	3	2	3	3	3	2	2	2	2	2	1	2	3	2	3	2	3	3	3	3	3	3	3	3	2	3	3	2	2	3	3	2	2	3	2
1910	1	26	11	4	1	3	4	4	3	3	1	3	4	2	1	1	4	3	1	4	1	3	4	2	1	4	4	2	1	4	2	4	3	4	4	4	4	1	1	1	3	1	4	4	4	2	4	1	3
1913	0	34	11	1	2	3	4	3	3	3	1	4	2	4	3	3	2	3	2	4	2	1	3	1	1	2	3	4	2	3	3	2	2	2	3	4	2	3	2	3	3	2	1	4	3	2	4	3	2
1916	1	30	11	4	2	3	3	2	2	2	1	4	1	3	2	3	4	3	3	2	2	1	1	1	1	3	1	2	2	2	3	3	4	2	3	2	2	3	2	4	3	3	2	4	3	2	3	3	2
1917	1	43	11	1	2	3	3	3	2	4	2	3	3	3	3	3	2	3	2	2	3	3	4	2	3	2	4	3	2	2	3	2	2	3	3	3	2	2	2	3	3	3	3	2	2	2	3	3	2
1918	1	28	15	2	2	3	4	4	4	4	2	4	3	3	2	4	3	4	1	3	1	2	3	2	1	2	4	2	2	2	4	2	2	2	3	3	2	2	1	3	3	2	2	4	4	1	4	2	2
1919	1	53	11	3	1	3	3	3	3	2	1	2	1	3	3	3	3	3	3	3	1	1	1	2	3	2	1	1	4	1	3	2	3	3	3	4	2	2	4	3	3	2	1	2	3	2	3	3	2
1921	1	59	11	4	3	2	4	3	1	1	1	4	1	3	4	3	1	2	4	1	3	1	2	2	1	1	2	3	4	1	3	3	1	2	3	4	1	4	1	3	4	4	1	4	2	1	2	4	1
1922	1	31	11	3	2	3	3	3	3	3	1	2	2	3	3	2	1	3	3	2	3	1	3	2	3	3	3	3	3	2	3	2	2	3	3	3	2	3	1	3	4	3	1	3	2	3	3	3	3
1923	0	33	11	1	3	3	4	1	1	1	3	3	1	3	3	4	2	4	2	2	3	1	1	1	3	3	2	3	3	2	4	3	4	3	4	3	2	3	1	3	3	3	1	3	3	3	3	3	1
1925	1	31	11	4	2	3	3	2	4	1	1	4	1	2	4	2	2	4	2	1	4	3	1	1	1	2	2	1	2	2	3	3	3	3	4	4	1	2	2	3	3	4	2	4	1	2	3	4	2
1929	0	24	12	1	2	3	1	2	4	2	1	2	1	3	1	3	4	2	1	3	3	2	1	3	1	4	2	2	2	4	3	2	2	2	3	2	2	1	2	3	3	2	2	1	1	2	2	1	3
1930	0	35	15	2	4	4	4	4	3	3	4	4	1	4	1	4	3	3	1	3	1	3	1	3	1	3	3	1	2	3	3	2	2	2	2	3	4	1	2	4	2	1	3	1	3	3	1	1	1
1936	1	39	11	4	2	2	3	2	2	3	1	3	1	3	3	3	4	2	3	2	2	2	2	1	1	3	3	2	3	2	3	2	2	2	3	3	2	4	1	3	3	2	1	4	3	2	3	2	2
1937	0	32	11	4	1	3	3	3	3	1	1	4	2	2	2	3	4	4	2	3	1	3	3	1	1	3	3	4	4	3	4	3	3	2	1	3	2	3	1	4	2	1	4	3	2	1	3	2	1
1938	1	25	11	3	2	3	3	1	2	4	2	3	3	3	3	4	1	3	2	3	3	2	3	2	1	2	3	3	2	2	3	2	3	2	3	3	2	3	2	2	1	3	2	3	2	3	2	4	2
1939	1	37	11	1	2	2	3	3	3	4	3	3	2	3	3	3	2	3	3	3	3	2	3	2	2	3	3	2	3	3	3	3	2	3	3	3	3	3	3	3	3	3	2	3	2	3	2	3	3
1940	1	38	11	3	2	2	4	2	3	4	1	4	2	2	1	3	3	4	2	2	2	1	1	2	4	3	2	1	2	3	3	4	2	3	3	3	3	3	2	3	2	2	1	4	4	1	2	3	2
1941	1	30	11	2	3	2	3	4	3	2	1	3	2	3	3	4	3	3	3	2	3	3	2	1	1	2	2	2	2	1	2	2	2	2	4	3	1	3	1	3	4	4	2	4	4	2	3	4	2
1942	0	21	6	3	3	4	2	3	3	3	1	3	2	3	3	3	3	3	3	3	3	2	4	2	3	2	3	4	1	1	3	2	1	3	4	2	2	2	2	2	3	3	2	2	3	4	3	3	2
1943	0	36	11	3	4	3	3	2	4	1	2	3	1	1	3	4	1	4	4	2	3	3	1	1	2	2	3	4	4	2	3	2	2	2	3	4	2	3	1	3	4	3	2	3	1	2	2	3	2
1944	1	20	11	3	3	2	4	3	3	3	2	3	1	2	2	3	1	3	3	3	3	2	1	2	2	2	2	4	2	2	2	3	4	3	3	3	2	4	2	4	3	3	2	3	2	2	3	3	2
1945	1	20	11	2	3	2	3	3	3	3	2	3	2	3	3	3	2	2	3	3	3	3	3	3	4	2	3	3	2	2	2	3	2	2	3	3	3	3	3	3	3	3	3	3	3	3	3	3	2
1946	1	37	11	1	2	4	4	3	4	4	2	4	1	4	2	4	4	1	2	2	2	3	2	1	3	3	4	3	1	3	3	4	1	1	4	4	1	1	2	4	4	2	3	4	1	1	4	2	1
1947	1	30	7	2	3	2	4	3	3	2	1	4	1	2	3	4	3	2	3	3	2	1	3	1	2	1	2	4	3	1	4	2	2	1	4	2	2	1	1	3	3	3	1	4	1	2	4	3	2
1948	1	36	11	1	3	3	3	2	4	4	1	4	3	4	4	3	4	2	2	3	4	3	3	1	1	1	3	1	3	1	3	3	2	3	3	3	1	2	1	3	4	4	2	4	3	2	4	4	2
1949	1	31	11	4	2	1	2	1	3	3	1	4	1	3	2	4	1	2	4	4	4	1	1	1	1	4	1	1	4	1	4	1	2	1	4	4	1	4	1	4	4	3	1	1	1	1	3	4	1
1950	1	23	5	2	3	3	3	2	3	4	2	3	3	4	3	4	2	4	3	2	3	2	2	2	1	3	4	3	3	2	4	2	4	3	3	3	4	3	2	3	3	3	3	3	3	2	4	3	2
1952	1	23	11	3	1	2	3	3	3	2	3	3	1	4	2	2	1	1	1	2	2	2	1	1	3	3	1	2	2	2	3	3	4	2	3	2	1	3	2	3	3	2	3	3	1	2	2	3	1
1953	1	30	11	3	2	2	4	3	3	3	2	4	2	3	3	3	4	4	3	3	3	2	2	1	1	1	3	2	2	2	3	3	3	2	3	3	2	3	1	3	3	3	2	3	4	3	3	3	2
1954	0	22	11	3	2	1	4	3	3	3	1	4	4	2	2	3	4	4	1	4	2	1	4	2	1	3	4	2	2	3	2	1	2	2	3	3	1	4	2	2	3	3	3	3	4	1	3	2	2
1955	0	34	11	4	3	2	3	1	2	3	1	2	2	3	3	3	1	2	3	2	3	2	2	3	4	2	3	3	2	2	3	3	3	2	3	3	1	2	1	3	4	3	2	3	1	2	2	4	2
1956	1	55	11	2	4	1	3	2	3	4	3	4	2	3	2	4	2	3	3	3	2	3	2	2	1	3	3	4	3	3	4	3	2	2	4	3	2	3	3	3	3	2	3	3	2	2	4	3	2
1958	1	29	7	2	2	2	4	2	4	2	2	3	4	4	4	3	1	3	4	2	4	3	3	1	1	2	3	2	3	1	4	2	1	1	4	4	2	4	2	4	4	4	3	4	4	3	4	4	3
1959	0	35	11	3	2	1	4	3	3	3	1	3	2	3	4	3	1	3	4	3	3	2	3	2	1	1	3	3	3	1	3	4	2	3	3	4	1	4	2	3	3	4	2	3	4	3	2	4	2
1960	1	57	15	1	4	4	4	3	4	4	3	4	1	1	2	4	4	1	4	1	3	1	3	1	1	3	1	1	3	3	2	1	1	1	2	4	1	4	1	3	3	3	1	4	1	1	1	4	3
1961	1	47	11	3	1	1	4	4	4	2	2	4	2	4	4	4	2	4	4	4	4	3	1	1	1	1	4	2	2	1	4	4	3	1	3	4	2	3	2	4	4	4	2	4	2	1	1	4	1
1962	1	22	11	3	3	2	3	4	4	4	1	4	4	4	2	4	4	1	4	4	2	1	4	2	2	4	4	2	2	4	2	4	1	4	4	2	3	3	2	4	3	1	3	3	4	4	3	3	2
1963	1	56	11	1	2	3	3	3	4	1	1	2	1	2	2	3	2	1	3	2	2	2	1	2	3	3	2	3	3	3	4	2	1	2	3	3	2	2	1	3	3	2	1	3	1	2	3	2	2
1965	1	24	11	2	3	4	3	3	3	2	1	4	1	2	3	3	3	3	3	4	3	3	2	2	2	3	1	2	3	2	3	3	3	2	3	2	3	2	2	2	2	3	2	4	3	3	3	3	3
1967	1	38	14	2	2	3	4	3	4	4	3	4	2	4	2	4	4	3	2	3	1	2	2	1	1	2	4	3	2	2	4	4	3	1	4	4	2	3	1	4	4	1	1	4	2	3	3	2	1
1968	1	27	11	2	1	3	3	1	3	2	1	4	3	2	1	4	4	4	3	1	2	1	3	1	3	3	3	2	2	3	2	2	3	3	1	3	2	3	4	3	3	1	2	3	3	3	3	1	3
1969	1	20	7	1	3	3	3	3	3	3	3	3	3	3	3	3	3	3	3	3	3	3	3	3	3	3	3	3	3	3	3	3	3	3	3	3	3	3	3	3	3	3	3	3	3	3	3	3	3
1970	1	53	11	1	2	3	2	1	2	3	1	4	1	2	2	2	3	3	2	3	4	1	3	1	1	1	4	4	2	1	3	4	1	1	4	4	2	2	2	3	4	3	3	3	1	3	4	4	2
1972	1	28	7	2	4	4	3	4	4	1	4	2	2	3	3	4	4	1	4	4	3	3	3	1	1	3	3	4	2	3	3	3	4	4	4	3	2	4	1	4	3	3	4	4	2	2	3	4	2
1973	1	59	11	3	4	2	3	4	4	3	3	4	2	2	1	4	4	4	2	2	1	1	1	1	1	3	2	3	2	3	3	2	2	2	3	1	4	3	2	4	3	1	1	3	1	1	3	2	1
1974	1	25	11	1	2	3	3	3	4	3	2	4	1	3	3	3	2	2	3	4	4	2	2	2	1	2	3	3	4	3	3	3	2	2	3	2	2	3	2	3	3	3	2	4	2	3	2	3	2
1975	1	44	11	1	3	3	4	4	3	1	1	4	1	3	4	3	2	2	3	2	3	1	1	1	1	1	1	4	3	2	4	3	3	2	4	3	1	2	1	3	4	4	1	4	1	2	3	3	1
1976	0	23	11	2	4	4	4	1	4	1	1	4	1	4	4	4	1	4	4	2	4	1	1	1	1	1	1	4	4	1	4	4	4	4	4	1	1	4	1	4	4	4	4	4	1	1	1	4	1
1978	1	32	11	3	2	3	4	3	4	4	1	4	4	4	4	4	4	3	2	3	3	2	4	1	1	1	4	1	1	2	4	3	1	1	4	4	1	2	1	4	4	4	3	3	4	3	4	3	1
1979	1	46	10	1	4	2	3	3	2	1	1	4	1	3	4	2	2	2	2	2	4	1	1	1	1	3	1	4	2	1	1	2	3	3	3	4	2	4	1	2	3	3	1	3	1	2	2	4	3
1980	0	30	14	4	3	1	4	4	4	3	2	4	1	4	4	4	3	4	4	4	2	2	1	1	1	3	3	2	4	2	4	3	4	2	4	3	2	4	1	4	3	3	1	3	1	1	1	4	1
1981	0	23	11	1	2	2	4	3	4	4	3	4	1	4	3	4	1	3	2	3	2	1	2	2	1	2	4	4	3	2	4	2	3	1	4	4	2	3	1	4	4	3	2	3	3	1	3	2	1
1982	0	40	14	2	2	2	3	3	2	2	1	3	1	1	2	2	1	3	1	4	2	1	1	1	1	1	1	4	2	1	3	4	4	4	3	2	1	4	2	3	2	2	3	2	1	1	3	2	2
1983	0	28	7	4	3	2	4	2	4	4	1	4	3	3	2	4	2	3	2	4	4	3	3	1	1	1	4	4	1	3	3	2	4	2	4	3	2	3	1	4	4	3	1	4	4	1	4	4	1
1985	1	41	11	1	3	3	4	1	3	2	1	4	3	4	4	4	2	3	4	2	4	2	3	2	2	1	4	3	4	1	4	4	2	2	4	4	1	4	1	4	4	4	1	4	3	3	1	4	1
1988	1	22	11	2	3	3	4	4	4	4	3	4	2	4	4	3	3	4	4	4	4	3	3	1	1	1	3	2	2	1	4	4	2	1	4	4	1	4	1	4	4	4	3	4	4	1	4	4	1
1992	1	34	11	2	2	3	3	3	4	3	1	4	1	3	2	3	3	3	1	3	2	1	2	1	1	3	3	2	2	3	3	2	2	2	3	2	2	3	2	3	4	1	2	4	2	1	3	2	2
1993	0	43	11	3	3	2	4	3	2	2	1	3	3	2	3	3	2	4	2	4	4	2	4	3	2	1	2	3	2	3	3	4	3	2	2	3	2	3	3	4	2	2	3	3	2	2	4	4	3
1995	1	31	14	2	3	3	2	1	3	3	2	3	2	2	3	3	2	1	3	3	3	3	2	2	1	2	3	3	3	3	3	3	3	2	3	3	2	2	2	3	3	3	3	1	3	3	3	3	2
1996	0	45	11	2	3	3	2	2	2	3	3	3	2	2	3	3	2	2	3	3	2	2	2	3	3	2	2	2	3	3	2	2	3	2	3	3	2	2	2	3	2	3	3	3	2	2	3	3	2
1999	1	56	14	3	4	2	2	2	2	2	1	3	2	1	1	3	4	2	4	1	3	1	1	2	2	2	2	1	3	2	2	2	4	2	3	3	2	4	2	2	4	3	1	4	3	3	2	3	2
2000	1	28	11	3	3	2	3	3	2	3	1	3	2	3	3	3	2	4	2	2	3	2	2	3	1	2	3	2	3	1	3	2	2	2	4	3	1	3	1	4	3	3	1	3	2	2	2	4	1
2002	1	40	5	3	3	2	3	4	2	1	2	3	2	2	3	3	2	3	4	2	3	2	3	2	1	2	3	2	2	2	3	2	3	2	2	3	1	4	2	2	3	3	2	3	2	2	3	4	2
2003	0	29	3	3	3	4	1	4	3	4	3	3	4	3	4	2	4	3	3	3	3	4	3	3	4	3	4	4	2	4	3	3	4	2	3	4	3	4	3	3	3	3	3	1	2	3	3	4	3
2004	1	51	14	4	1	1	3	3	3	1	1	3	1	1	1	3	4	3	3	3	1	1	1	2	1	4	3	2	2	2	3	3	4	2	3	1	1	2	1	3	2	1	1	3	1	2	4	1	2
2005	0	40	11	1	2	1	3	4	4	3	3	4	2	3	3	4	2	3	2	4	1	3	2	2	2	2	3	2	2	2	4	2	3	2	3	2	2	3	2	4	1	2	3	3	3	2	2	3	2
2006	1	27	15	1	3	1	4	3	4	3	1	4	3	3	3	4	2	4	4	4	4	2	2	2	1	2	3	1	2	2	3	2	2	3	4	4	2	4	1	2	2	3	1	4	4	1	1	4	2
2007	1	26	10	2	2	2	2	2	3	1	1	3	1	1	1	2	4	3	2	3	3	1	3	2	2	3	2	2	2	3	3	2	3	3	4	2	3	3	3	3	3	3	2	4	1	2	2	1	3
2008	0	31	6	3	3	3	2	2	3	3	2	1	2	2	3	2	2	3	3	3	2	2	1	2	3	3	2	3	1	2	2	2	2	2	2	1	2	2	1	2	1	2	3	3	2	2	2	3	3
2009	1	27	11	4	3	2	4	3	3	1	1	4	1	2	4	2	3	2	3	1	3	1	1	1	1	1	2	4	2	3	3	4	4	1	3	4	1	4	1	3	4	3	2	4	1	2	3	4	1
2010	0	24	11	1	2	3	1	4	2	1	3	1	1	1	1	3	2	4	1	3	1	3	2	3	1	4	4	1	2	3	3	2	4	1	3	1	3	3	2	4	1	2	4	4	3	4	3	3	4
2011	0	39	5	2	2	2	3	2	2	2	1	4	2	4	3	3	3	4	2	1	3	1	2	1	1	1	3	3	3	1	4	3	2	2	3	3	1	3	1	3	3	3	1	3	3	2	2	3	1
2012	1	34	11	3	1	4	3	3	3	3	2	4	3	3	2	4	4	3	1	2	1	1	2	1	4	3	3	3	2	2	3	2	3	2	3	4	1	2	1	3	2	2	2	2	3	3	4	2	2
2014	0	18	10	1	1	3	4	3	4	4	4	4	2	3	1	4	4	4	2	4	1	3	2	1	2	4	3	1	1	4	4	3	2	2	1	1	4	3	4	1	3	1	4	3	3	2	4	1	1
2015	0	29	3	4	2	3	1	4	2	4	3	3	2	3	1	3	4	4	2	3	1	3	4	2	2	2	4	2	2	3	3	4	4	4	4	4	2	2	2	2	3	1	3	1	4	2	3	1	4
2016	1	28	11	4	2	3	3	2	3	1	1	3	1	2	1	2	3	3	3	2	1	2	2	2	1	3	2	2	2	3	3	4	3	3	3	3	3	3	2	3	3	2	2	4	1	2	2	2	2
2018	1	47	11	1	3	4	4	4	4	4	2	4	4	2	2	4	4	2	2	4	1	2	4	3	3	3	3	1	2	3	2	2	2	1	2	2	4	2	4	1	2	2	2	2	4	2	3	2	3
2020	0	30	11	3	3	3	2	3	1	3	1	3	1	2	3	3	3	2	3	3	3	1	3	2	2	1	3	2	2	3	3	3	1	3	3	3	1	3	1	3	3	3	3	4	2	1	3	3	2
2022	1	36	11	3	1	4	2	3	3	1	1	1	1	1	1	4	4	1	1	1	1	1	4	4	1	4	4	1	1	4	3	1	1	1	3	3	3	1	4	1	2	1	3	1	1	3	4	1	4
2023	1	33	11	3	2	2	3	1	1	3	1	3	1	3	3	3	4	3	3	2	3	1	1	1	2	2	2	2	3	2	4	4	2	2	4	4	1	3	1	3	4	3	1	4	2	2	3	3	2
2028	1	26	7	4	3	3	3	4	4	4	3	4	2	2	2	4	4	3	4	4	2	3	1	3	2	2	4	3	2	4	4	2	2	1	4	2	2	3	3	4	2	2	1	4	2	2	4	3	2
2030	0	43	7	2	4	4	3	3	2	1	3	2	1	1	1	2	4	1	1	3	1	1	2	3	3	4	3	2	2	4	2	3	3	3	2	2	3	2	3	1	2	1	3	2	1	4	2	1	3
2032	1	33	11	4	2	2	3	2	2	1	1	2	1	1	4	1	2	2	3	1	3	2	1	1	1	1	1	4	2	1	3	3	4	3	3	2	1	2	3	4	3	4	1	3	1	2	3	3	1
2033	1	29	11	2	4	4	4	3	4	1	1	4	4	4	4	1	1	2	4	2	4	1	4	1	1	1	2	4	3	1	4	3	4	1	4	4	1	4	1	4	4	4	2	4	4	1	4	4	1
2034	1	53	11	3	3	2	4	3	1	2	2	3	1	3	2	1	1	3	3	2	1	4	1	1	1	2	1	2	4	3	4	3	1	2	4	4	1	4	1	4	4	2	1	4	1	1	1	3	1
2035	1	55	11	1	3	3	2	2	2	2	1	2	1	3	3	2	1	2	3	2	3	3	1	2	2	2	1	1	3	3	3	3	4	4	2	3	2	3	2	2	3	3	2	1	1	3	3	3	3
2036	0	51	11	1	2	2	3	2	3	2	2	3	2	3	3	2	1	2	2	2	2	2	2	2	3	2	2	3	2	2	3	2	3	3	3	3	2	3	2	3	3	2	2	3	3	2	3	2	2
2038	1	48	11	3	4	3	4	2	2	3	1	3	3	4	4	4	1	3	4	2	4	2	3	1	1	1	2	2	3	2	3	2	2	2	3	4	1	4	1	4	4	4	1	4	3	2	4	4	1
2040	1	31	11	4	3	3	3	4	3	3	1	3	1	1	4	3	1	2	4	3	4	4	2	1	1	2	3	1	2	2	2	4	1	2	4	3	1	3	2	3	3	4	1	4	4	1	3	4	1
2042	1	55	11	4	2	1	4	4	2	1	1	3	1	4	4	4	4	4	3	2	1	2	1	1	3	1	1	1	4	1	4	3	3	3	3	4	1	4	1	4	4	4	3	4	1	4	3	3	1
2043	1	55	11	4	3	2	4	2	2	1	2	4	3	3	4	3	2	2	4	3	4	3	1	2	1	1	2	3	3	2	3	2	3	1	3	3	1	3	3	3	3	4	1	4	3	2	2	4	3
2044	1	36	11	4	2	3	3	3	2	2	1	4	2	2	2	2	3	3	2	3	2	1	1	1	1	4	2	2	2	3	4	3	3	3	2	2	2	2	2	3	2	2	2	3	2	2	2	2	2
2046	1	32	11	1	3	3	4	4	4	4	3	4	2	4	2	4	4	4	2	3	3	4	3	1	1	2	4	2	3	2	4	4	2	1	4	4	1	3	1	4	4	3	4	4	3	1	2	3	1
2047	1	32	11	1	2	3	2	3	2	1	1	3	1	2	2	3	2	2	2	2	2	3	1	2	2	4	2	2	3	4	3	3	4	3	4	3	2	3	2	3	3	2	2	4	2	2	2	3	2
2048	0	36	11	3	3	2	2	3	1	4	1	3	3	2	3	2	4	1	3	2	2	1	4	1	1	2	3	4	4	2	3	4	1	2	4	4	1	4	1	3	4	2	1	3	2	1	1	3	1
2049	1	33	13	2	2	3	2	4	4	4	2	3	2	3	3	4	2	3	3	4	4	4	4	1	1	2	4	3	2	2	2	1	2	1	4	4	2	4	1	3	1	3	2	3	4	1	4	3	3
2050	1	46	15	1	2	3	4	3	4	2	1	4	1	3	2	3	3	4	3	3	3	2	1	1	1	3	2	3	4	2	3	3	3	2	4	2	1	3	2	4	3	3	2	4	1	1	3	3	2
2051	1	58	11	1	2	2	2	4	4	2	2	3	3	3	2	3	3	1	3	3	2	2	4	2	2	2	2	2	2	2	3	3	3	3	3	2	3	2	3	2	3	3	2	4	3	4	3	3	3
[truncated: 138 more columns]
